# Supplementary material
Source: ML conference proceedings conference paper supplement (https://openreview.net/forum?id=huh0XmSdBK)
Supplement: supplementary_material [file attachment]

---

# NPCL: Neural Processes for Uncertainty-Aware Continual Learning

---

Anonymous Author(s)

Affiliation

Address

email

## Abstract

1 Continual learning (CL) aims to train deep neural networks (DNNs) efficiently  
2 on streaming data while limiting the forgetting caused by new tasks. However,  
3 learning transferable knowledge with less interference between tasks is difficult,  
4 and real-world deployment of CL models is limited by their inability to measure  
5 predictive uncertainties. To address these issues, we propose handling CL tasks  
6 with neural processes (NPs), a class of meta-learners that encode different tasks  
7 into probabilistic distributions over functions all while providing reliable uncertainty  
8 estimates. Specifically, we propose an NP-based CL approach (NPCL) with  
9 task-specific modules arranged in a hierarchical latent variable model. We tailor  
10 regularizers on the learned latent distributions to alleviate forgetting. We then  
11 use uncertainty estimation capabilities of NPCL to handle the fundamental CL  
12 challenge of task head inference. Our experiments show that NPCL outperforms  
13 previous CL approaches. We validate the effectiveness of uncertainty estimation in  
14 NPCL for identifying novel data and evaluating instance-level model confidence.

## 15 1 Introduction

16 Continual learning (CL) aims to help deep neural networks (DNNs) learn from a stream of non-  
17 stationary tasks by retaining the previously acquired knowledge [48, 32]. To achieve this, CL agents  
18 target alleviating the *catastrophic forgetting* issue with restricted computational and memory costs  
19 [37]. This requires balancing the plasticity for new knowledge with the stability for old [33].

20 To avoid forgetting in CL, experience replay (ER) methods [27, 6] are one effective way to train DNNs  
21 on a memory buffer with a subset of the past tasks' experiences. Other than the ER methods, many  
22 regularization-based approaches have also been proposed to penalize the forgetting on the DNNs'  
23 parametric [27] or representation spaces [5, 4]. However, these may still suffer from interference due  
24 to the regularization on the entire parameter space [7]. To address this, parameter isolation methods  
25 [47, 30] define task-specific training components but are usually confined to task incremental CL  
26 setups [42]. It is thus challenging for CL agents to maintain transferable and shareable knowledge.  
27 Furthermore, a hurdle to the real-world deployment of CL agents is their inability to measure  
28 predictive uncertainties. This, like other autonomous learning agents, keeps them from safety critical  
29 applications [28].

30 To tackle the above issues, we propose to explore CL models using neural processes (NPs) [12, 13], a  
31 class of meta-learners that model tasks as data generating functions from a stochastic process. NPs  
32 learn a prior over functions by marginalizing over a set of data points, or *context*, thus enabling  
33 rapid adaptation to new observations through inference on functions. Additionally, their probabilistic  
34 nature endows them with reliable uncertainty quantification capabilities [13, 24]. Our motivations to  
35 explore NPs for CL are thus two-fold. First, NPs exploit Bayes' theorem which naturally enables  
36 CL through sequential posterior construction. Namely, NPs perform inference over the function

37 space by learning context-based priors which are updated to posteriors upon observing (additional)  
 38 *targets*. Second, NPs meta-learn input correlations through a latent variable. For CL, this could  
 39 be the key to meta-learn knowledge transfer across correlated tasks. However, NPs cannot directly  
 40 handle CL tasks given: (a) the reliance on a single global latent leads to suboptimal modeling  
 41 of complex CL signals where multiple correlated tasks could occur simultaneously, (b) NPs still  
 42 need to handle the forgetting of past task correlations arising from the non-static data stream.  
 43

44 To address the above desiderata, we propose Neural Processes for Continual Learning (NPCL), a hierarchical latent  
 45 variable model with a global latent to capture inter-task correlation and task-specific latents for finer knowledge. Fig.  
 46 1 shows NPCL exploiting functional correlation among current and past task training samples of ER. The drift of global  
 47 and past task-specific distributions away from their original forms serve as the major aspect of forgetting in NPCL. We  
 48 thus propose to regularize these towards their old forms and show the merits of it over typical parameter-based regu-  
 49 larization. We then leverage the uncertainty encoded by NPCL for the aforesaid CL challenge of task head inference.  
 50 To this end, we propose using entropy as an uncertainty quantification metric (UQM). NPCL outperforms previous  
 51 probabilistic CL models and delivers better or comparable results than state-of-the-art deterministic CL methods,  
 52 which usually have an edge over their probabilistic counterparts in terms of accuracy. To study the further usages of  
 53 NPCL’s uncertainty estimation, we show its out-of-the-box readiness for novel data detection and  
 54 instance-level confidence evaluation [16]. Lastly, we list the key limitations of NPCL as an attempt to  
 55 lay further solid directions for uncertainty-aware CL.  
 56  
 57  
 58  
 59  
 60  
 61  
 62  
 63  
 64

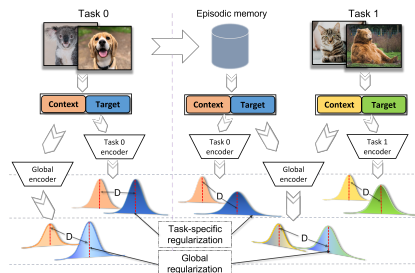

Figure 1: **Neural Processes for Continual Learning**: each training step involves minimizing the distance  $D$  between the context-based prior and the target-based posterior, alongside regularizing the task-specific and global distributions towards their old forms.

## 65 2 Related Work

66 **Continual Learning (CL)**. CL methods address catastrophic forgetting through three major ap-  
 67 proaches: (a) *Regularization-based* methods penalize changes in a model’s important weights for  
 68 previous tasks; e.g., Elastic Weight Consolidation (EWC) [27], Synaptic Intelligence (SI) [48], etc.  
 69 (b) *Parameter Isolation-based* methods partition the network’s parameters to specialize on individual  
 70 tasks; e.g., Yan et al. [46] using variational Bayesian sparsity priors to reserve model capacity for  
 71 future tasks, Douillard et al. [8] learning task-specific tokens for Transformers, etc. (c) *Replay-based*  
 72 methods use an episodic memory to preserve a fraction of the past tasks’ experience, and use these to  
 73 prevent forgetting while learning on new tasks; e.g., experience replay (ER) [6] storing past inputs,  
 74 and dark experience replay (DER) [4] storing past logits. Our method uses (a) via regularization of  
 75 distributions, (b) via task-specific latent heads, and (c) via replay of past task inputs and distributions.

76 **Neural Processes (NPs)**. NPs were introduced to meta-learn a family of data-generating functions  
 77 through their deterministic [12] and / or latent summaries [13]. Attentive NPs (ANPs) [24] replaced  
 78 the averaging operation in NPs with a dot-product attention [43] to enhance their expressivity. (A)NPs  
 79 rely on a global latent that limits their ability to model observations from multiple functions. Recent  
 80 works address this through local latents that model fine-grained correlation among a subset of the  
 81 observations [45]. In particular, our work is inspired by multi-task processes (MTPs) [23] that model  
 82 multiple tasks owing to the hierarchy of task-specific latents conditioned on a global latent. However,  
 83 MTPs have more relaxed constraints than CL because: (a) MTPs are not trained sequentially on tasks  
 84 and are thus free of forgetting; (b) at test time, MTPs assume each input to be mapped to all tasks and  
 85 thus bypass the issue of task head inference pervading class-incremental learning.

86 Besides, the added complexity of variational inference has limited NP applications to mostly toy  
 87 regression tasks [22]. The potential of NPs for large-scale classification tasks thus remains largely  
 88 unexplored, if not untouched. Wang et al. [44], for instance, leverage the predictive uncertainties of  
 89 NPs to decide on pseudolabels for unlabeled data in semi-supervised classification. We, therefore, use  
 90 NPs for CL because of a number of their intrinsic properties including principled Bayesian learning,  
 91 uncertainty estimation, and easy integration with preexisting CL methods like ER.

92 **3 Preliminaries: Neural Processes**

93 NPs [12, 13] meta-learn a task  $t$  as the mapping  $F_*^t : X^t \rightarrow Y^t$ .  $F_*^t$  generates data  $\{(x^t, y^t)\} =$   
 94  $(X^t, Y^t) \sim \mathcal{D}^t$  constituting of: (a) a context set  $|\mathcal{C}^t| = m$  that offers a prior, and (b) a target set  
 95  $|\mathcal{T}^t| = m + n$  that contains additional samples to compute the posterior over the full observations.  
 96 NPs learn the Gaussian priors and posteriors using a neural network  $F_{[\phi; \theta]}^t \approx F_*^t$ , where  $\phi$  and  $\theta$   
 97 parameterize an encoder  $q$  and a decoder  $p$ , respectively. This involves deriving a global variable  $z^G$   
 98 to estimate the prior  $p(z^G | \mathcal{C}^t; \phi)$ , and then maximizing the marginal likelihood  $p(Y_{\mathcal{T}}^t | \mathcal{C}^t, X_{\mathcal{T}}^t; \theta)$ :

$$p(Y_{\mathcal{T}}^t | X_{\mathcal{T}}^t, \mathcal{C}^t) = \int p(Y_{\mathcal{T}}^t | X_{\mathcal{T}}^t, z^G) p(z^G | \mathcal{C}^t) dz^G, \quad (1)$$

99 where  $p(Y_{\mathcal{T}}^t | X_{\mathcal{T}}^t, z^G) = \prod_{i=1}^{m+n} p(y_i^t | x_i^t, z^G)$  is the generative likelihood. In a CL setup, memorizing  
 100 the task prior  $p(z^G | \mathcal{C}^t; \phi)$  can help NPs avoid forgetting the  $t$ -th task. Our aim behind enabling NP  
 101 for CL is to seek a trade-off to preserve such task priors while sharing the parameters among tasks.

102 **4 Continual Learning with Neural Processes**

103 A CL setup considers  $\mathcal{D}^t$  from  $0 \leq t \leq T - 1$  sequentially arriving tasks. Using cross-entropy (CE)  
 104 as the classification loss  $l$ , the CL objective for the task  $t$  involves minimizing:

$$\mathcal{L}_{CE}^t = \mathbb{E}_{(x,y) \sim \mathcal{D}^t} l(F_{[\phi; \theta]}(x), y) \quad (2)$$

105 on all  $[0, t]$  seen tasks. Achieving Eq. (2) is challenging in real-world scenarios where the previous  
 106 datasets can be unavailable due to constraints on privacy, storage, etc. To bypass this, several CL  
 107 approaches employ *experience replay* (ER) where a small episodic memory  $\mathcal{M}$  is updated periodically  
 108 to store and revisit minibatches of past experiences  $(x^t, y^t) \sim \mathcal{M}$  for a task  $t$  [6, 32]. In this work,  
 109 we rely on reservoir sampling [6] for a task boundary-agnostic updating of  $\mathcal{M}$ .

110 Jointly optimizing parameters on  $\mathcal{D}^t$  and  $\mathcal{M}$  has several drawbacks [32, 4]. From a network capacity  
 111 view, exhausting the parameter space early makes interference from the latter tasks more likely. On a  
 112 generative stand, the deterministic mapping  $F^t$  limits capturing the randomness behind the real-world  
 113 data. Owing to these, we next propose extending Eq. (2) with Eq. (1) to arrive at a CL model that:  
 114 (a) allocates minimal parameters to learn robust per-task and global priors, and (b) uses generative  
 115 factors to meet data-driven challenges such as deducing the right parameters for inference.

116 **4.1 Neural Processes for Continual Learning**

117 We begin with a direct extension of the NP formulation to CL. In an ER setup, where the context and  
 118 target could be from  $t$  tasks, Eq. (1) can be extended to derive the joint posterior for NPs [13] as:

$$p(Y_{\mathcal{T}}^{0:t} | \mathcal{C}^{0:t}, X_{\mathcal{T}}^{0:t}) = \int p(Y_{\mathcal{T}}^{0:t} | X_{\mathcal{T}}^{0:t}, z^G) p(z^G | \mathcal{C}^{0:t}) dz^G, \quad (3)$$

119 where  $z^G$  models the joint distribution  $F_*^{0:t}$  of CL tasks and is an enabler of the knowledge transfer  
 120 [32] between these (see App. A.3 for ELBO). Eq. (3) still poses two challenges. First, it needs the  
 121 labeled context  $\mathcal{C}$  for inferring predictions, which is impossible in the CL setups where test data are  
 122 assumed to be unlabeled. To overcome this, we turn to using the memory  $\mathcal{M}$  offered by the ER-based  
 123 setups as *context* during inference. Second, jointly modeling  $F_*^{0:t}$  ignores the dynamics of per-task  
 124 stochasticities, and is still prone to the bottlenecks of Eq. (2). Addressing the latter, we next consider  
 125 *redefining* Eq. (3).

126 **4.2 NPs with Hierarchical Task-specific Priors for CL**

127 To learn informative task priors with knowledge transfer, we presume two solid directions. First,  
 128 inducing the knowledge transfer implies that we preserve the global latent  $z^G$ . Second, the task priors  
 129 could be captured better if modeled explicitly. We thus extend Eq. (3) with task-specific latents  
 130  $z^t = (z^0, \dots, z^t)$ . As a result, our posterior is a two-step hierarchical latent variable model (Fig. 2)  
 131 where the global and the per-task latents model the inter and intra-task correlations, respectively:

$$p(Y_{\mathcal{T}}^{0:t} | X_{\mathcal{T}}^{0:t}, \mathcal{C}^{0:t}) = \int \int \left[ \prod_{t=0}^{T-1} p(Y_{\mathcal{T}}^t | X_{\mathcal{T}}^t, z^t) p(z^t | z^G, \mathcal{C}^t) \right] p(z^G | \mathcal{C}^{0:t}) dz^{0:t} dz^G, \quad (4)$$

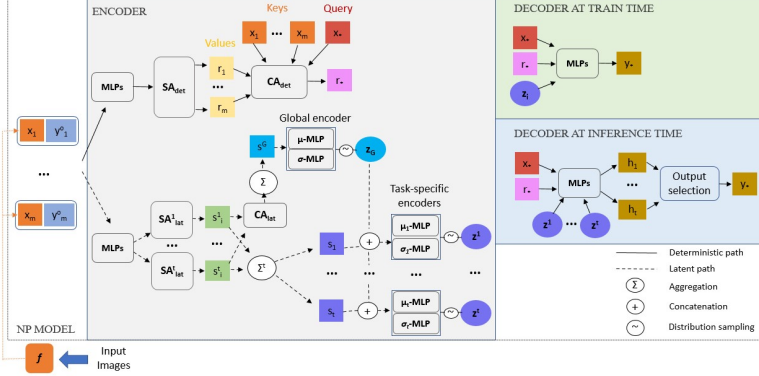

Figure 2: **NPCL architecture**: the decoding mechanism differs during training and inference.

132 where the entire context  $C^{0:t}$  is first encoded into  $z^G$  and then conditioned on  $z^G$ , the task-specific  
 133 context  $C^t := (C^0, \dots, C^t)$  are encoded into their respective latents. We refer to Eq. (4) as NP for CL  
 134 (NPCL). NPCL generalizes to the MTP [23] when the input labels span the entire output spaces (see  
 135 section 2). Next, we detail the neural network architecture for NPCL.

### 136 4.3 NPCL Architecture

137 Given the input images  $x_i \in \{\mathcal{C}, \mathcal{T}\}$ , we first pass these to a feature extractor  $f$ . With a slight  
 138 abuse of notation, we denote the features as  $x_i : x_i \in \mathbb{R}^{|f|}$  from here onward.  $x_i$  concatenated  
 139 with the one-hot encoded labels  $[x_i; y_i]$  is fed to the NPCL encoder with a deterministic and a latent  
 140 path, and then to the decoder. All NPCL layers use multi-layer perceptrons (MLPs) projections, *i.e.*,  
 141  $\text{MLP}(x) : \mathbb{R}^{|f|} \rightarrow \mathbb{R}^{|o|}$  where,  $o$  is a hyperparameter. We denote a normal distribution with a mean  
 142  $\mu$  and a variance  $\sigma^2$  by  $\mathcal{N}(\mu, \sigma^2)$ ; the global and the task-specific distributions are  $\mathcal{N}(\mu_G, \sigma_G^2)$  and  
 143  $\mathcal{N}(\mu_t, \sigma_t^2)$ . Lastly, by attention, we refer to the multi-head dot-product operations [43].

144 **Latent Encoder.** The latent path comprises of the projection  $\Phi_i^{\text{lat}} = \text{MLP}([x_i; y_i])$  followed by  
 145 two attention operations. First, per-task projections form the keys, values and queries to taskwise  
 146 self-attention layers  $SA_{\text{lat}}^t$  that produce order-invariant encodings  $s_i^t$  over the samples of task  $t$ .  
 147 Second, all encodings  $\{s_i^{0:t}\}_{i=1}^{n+m}$  serve as the keys, values and queries to cross-attention layers  $CA_{\text{lat}}^{0:t}$   
 148 that enrich their order-invariance from intra-task  $s^t$  to inter-task  $s^G$ .  $s^t$  and  $s^G$  are used to derive  
 149 the  $N$  and  $M$  Monte Carlo samples of the global  $z^G$  and the task-specific latents  $z^t$ , respectively  
 150 (see App. B for more details) using the reparameterization trick [26]. We set  $M = 1$  to enhance the  
 151 inter-task stochasticity in posterior. For each input, we thus get  $N * (t + 1)$  latent outputs.

152 **Deterministic Encoder.** The deterministic path is similar to that of the ANP [24] and outputs an  
 153 order-invariant representation  $r_*$  for target  $x_*$  (see App. B).

154 **Decoder.** Based on the task information, the decoder adopts separate mechanisms during training and  
 155 inference. At train time, we use the available task labels to filter the  $N$  true latents  $\{z_i^t\}_{i=1}^N$ , combine  
 156 them with  $r_*$  and  $x_*$ , and decode the logits  $h_*$ . We discuss the inference time decoding in sec. 4.5.

### 157 4.4 Learning Objectives for NPCL

158 The learning of NPCL is done by variational inference that maximizes the evidence lower bound with  
 159 additional regularizations.

160 **Evidence Lower Bound (ELBO).** The intractability of Eq. (4) leads us to the following ELBO:

$$\begin{aligned}
 \log p_\theta(Y_{\mathcal{T}}^{0:t} | X_{\mathcal{T}}^{0:t}, \mathcal{C}) &\geq \mathbb{E}_{q_\phi(z|\mathcal{T})} \left[ \sum_{t=0}^{T-1} \mathbb{E}_{q_\phi(z^t|z^G, \mathcal{C}^t)} [\log p_\theta(Y_{\mathcal{T}}^t | X_{\mathcal{T}}^t, z^t)] \right. \\
 &\quad \left. - D^t \left( q_\phi(z^t | z^G, \mathcal{T}^t) \| q_\phi(z^t | z^G, \mathcal{C}^t) \right) \right] - D^G \left( q_\phi(z^G | \mathcal{T}) \| q_\phi(z^G | \mathcal{C}) \right), \quad (5)
 \end{aligned}$$

161 where  $p_\theta(Y_{\mathcal{T}}^t | X_{\mathcal{T}}^t, z^t)$  is approximated by the CE loss.  $D^t$  and  $D^G$  denote the KL divergences  
 162 between the approximate posterior and prior for the task-specific and global distributions, respectively.  
 163 We derive the ELBO in App. A.1. We next identify two key aspects of forgetting in NPCL. In the  
 164 following, we use  $D$  to denote the Jensen-Shannon (JS) divergence [10] between two distributions.

165 **Global Regularization (GR).** The training data of a CL task  $t$  is dominated by the  $t$ -th task samples.  
 166 For NPCL, this drifts the global distribution  $\mathcal{N}(\mu_G^t, \sigma_G^t)$  of past tasks towards the new task (Fig. 1).  
 167 We thus regularize their global distribution using the one learned at step  $t - 1$ :

$$\mathcal{L}_{\text{GR}} = D(\mathcal{N}(\mu_G, \sigma_G^2)_t, \mathcal{N}(\mu_G, \sigma_G^2)_{t-1}), \quad (6)$$

168 **Task-specific Regularization (TR).** While GR helps preserve the joint distribution of the past tasks,  
 169 the hierarchy in NPCL leaves their task-specific distributions to be still prone to forgetting (Fig. 3(a)).  
 170 This can further amplify the posterior collapse [41] for past task-specific latents during incremental  
 171 training (Fig. 3(b)). To alleviate these, we regularize the learning of previous task distributions as:

$$\mathcal{L}_{\text{TR}}^t = D(\mathcal{N}(\mu_t, \sigma_t^2)_t, \mathcal{N}(\mu_t, \sigma_t^2)_j), \quad (7)$$

172 where  $j$  is the step at which the task  $t$  arrived. Given the reliance of Eq. (6) and Eq. (7) on past  
 173 distributions, we maintain a separate buffer, which we refer to as the distribution memory  $\mathcal{M}_{\mathcal{N}}$ , to  
 174 store the global  $\mathcal{N}(\mu_G, \sigma_G^2)$  and the task-specific distributions  $\mathcal{N}(\mu_{0:t-1}, \sigma_{0:t-1}^2)$ .  $\mathcal{M}_{\mathcal{N}}$  is updated  
 175 after each incremental training step where we run an additional pass over the training data of task  $t$   
 176 alongside replaying  $\mathcal{M}$  to record the batchwise averaged global and task-specific means and variances.

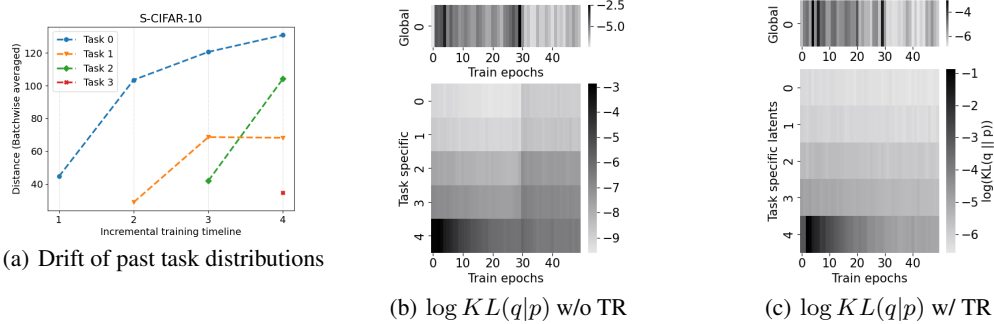

Figure 3: **Need for distribution regularization:** Fig. 3(a) show the increasing distances between current distributions of past tasks and their original distributions (learned while the tasks were introduced); Fig. 3(b) and 3(c) show the effect of global (GR) and task regularization (TR) on the activation of the global and task-specific latent units. Low KL corresponds to an inactive unit.

177

178 **Integrated Objective.** Using  $\alpha$ ,  $\beta$ ,  $\gamma$  and  $\delta$  to denote the loss weights, our total loss can be given as:

$$\mathcal{L} = \frac{1}{|\mathcal{D}^t| + |\mathcal{M}|} \sum_{x,t \in \{\mathcal{D}^t \cup \mathcal{M}\}} (\mathcal{L}_{\text{CE}} + \alpha D^t + \beta D^G) + \frac{1}{|\mathcal{M}|} \sum_{x,t \in \mathcal{M}} \gamma \mathcal{L}_{\text{GR}} + \delta \mathcal{L}_{\text{TR}}, \quad (8)$$

179 where CE,  $D^t$ , and  $D^G$  act on the current task data  $\mathcal{D}^t$  and on the buffer  $\mathcal{M}$  while GR and TR act  
 180 only on  $\mathcal{M}$ . By setting  $0 < \{\alpha, \beta, \gamma, \delta\} < 1$ , we resort to using the (respective) cold posteriors [49].

## 181 4.5 Inference with Uncertainty Awareness

182 NPCL’s inference uses  $f$  to obtain the features  $x_*$  for the target test images. However, now we have  
 183 no information on the target task label  $t$ . This leaves us with  $\{z_i^{0:t}\}_{i=1}^N$  possible variables to infer our  
 184 predictions from. A naive get around is to average over  $N * (t + 1)$  logits. But as the number of tasks  
 185 grows, the noise from incorrect task priors would dominate the posterior. We thus propose using  
 186 entropy as an uncertainty quantification metric (UQM) to filter the logits of the true task head  $\psi^t$ :

$$h_* = \arg \min_{j \in t} U(h_j), \quad U(h) = - \sum_{i \in N} \delta(i) \log(\delta(i)), \quad (9)$$

187 where  $\delta$  is the softmax function and  $U$  is the total Shannon entropy [40] over the  $N$  logits per head.  
 188 As we use true head  $\psi_\phi^t$  during training,  $\phi \in \psi^t$  produces low entropy for within distribution data.

| Method                            | S-CIFAR-10<br><i>Class-IL</i> |              | S-CIFAR-100<br><i>Class-IL</i> |       | S-Tiny-ImageNet<br><i>Class-IL</i> |              | P-MNIST<br><i>Domain-IL</i> |              | R-MNIST<br><i>Domain-IL</i> |              |
|-----------------------------------|-------------------------------|--------------|--------------------------------|-------|------------------------------------|--------------|-----------------------------|--------------|-----------------------------|--------------|
| Joint ResNet                      | 92.2 ± 0.15                   |              | 70.44                          |       | 59.99 ± 0.19                       |              | 94.33 ± 0.17                |              | 95.76 ± 0.04                |              |
| Joint NP                          | 91.66 ± 0.11                  |              | 70.58 ± 0.24                   |       | 59.83 ± 0.17                       |              | 95.02 ± 0.21                |              | 95.37 ± 0.07                |              |
| Joint ANP                         | 91.26 ± 0.16                  |              | 70.77 ± 0.21                   |       | 60.14 ± 0.17                       |              | 95.39 ± 0.18                |              | 95.85 ± 0.05                |              |
| Joint NPCL                        | 92.74 ± 0.12                  |              | 71.46 ± 0.20                   |       | 60.18 ± 0.22                       |              | 95.97 ± 0.14                |              | 96.11 ± 0.03                |              |
| Multitask NPCL                    | 69.15 ± 0.09                  |              | 53.6 ± 0.21                    |       | 35.53 ± 0.13                       |              | 87.40 ± 0.10                |              | 89.21 ± 0.02                |              |
| oEWC [39]                         | 19.49 ± 0.12                  |              | -                              |       | 7.58 ± 0.10                        |              | 75.79 ± 2.25                |              | 77.35 ± 5.77                |              |
| SI [48]                           | 19.48 ± 0.17                  |              | -                              |       | 6.58 ± 0.31                        |              | 65.86 ± 1.57                |              | 71.91 ± 5.83                |              |
| LwF [31]                          | 19.61 ± 0.05                  |              | -                              |       | 8.46 ± 0.22                        |              | -                           |              | -                           |              |
| $\mathcal{M}_{size}$              | 200                           | 500          | 500                            | 2000  | 200                                | 500          | 200                         | 500          | 200                         | 500          |
| ER [38]                           | 44.79 ± 1.86                  | 57.74 ± 0.27 | 22.10                          | 38.58 | 8.49 ± 0.16                        | 9.99 ± 0.29  | 72.37 ± 0.87                | 80.6 ± 0.86  | 85.01 ± 1.90                | 88.91 ± 1.44 |
| iCaRL [37]                        | 49.02 ± 3.20                  | 47.55 ± 3.95 | 46.52                          | 49.82 | 7.53 ± 0.79                        | 9.38 ± 1.53  | -                           | -            | -                           | -            |
| FDR [2]                           | 30.91 ± 2.74                  | 28.71 ± 3.23 | -                              | -     | 8.70 ± 0.19                        | 10.54 ± 0.21 | 74.77 ± 0.83                | 83.18 ± 0.53 | 85.22 ± 3.35                | 89.67 ± 1.63 |
| RPC [36]                          | -                             | -            | 22.34                          | 38.33 | -                                  | -            | -                           | -            | -                           | -            |
| DER [4]                           | 61.93 ± 1.79                  | 70.51 ± 1.67 | 36.6                           | 51.89 | 11.87 ± 0.78                       | 17.75 ± 1.14 | 81.74 ± 1.07                | 87.29 ± 0.46 | 90.04 ± 2.61                | 92.24 ± 1.12 |
| NP [13]                           | 46.1 ± 3.44                   | 59.3 ± 2.76  | 22.92                          | 38.70 | 8.32 ± 0.62                        | 10.2 ± 0.34  | 70.02 ± 1.44                | 79.44 ± 0.81 | 85.03 ± 2.7                 | 88.16 ± 1.66 |
| ANP [24]                          | 46.67 ± 1.23                  | 58.77 ± 0.65 | 23.2                           | 39.06 | 8.81 ± 0.93                        | 9.75 ± 0.90  | 73.55 ± 0.66                | 80.98 ± 0.57 | 85.70 ± 1.39                | 89.21 ± 0.93 |
| ST-NPCL (w/ only per-task latent) | 54.6 ± 2.14                   | 65.22 ± 1.89 | 28.45                          | 42.1  | 10.92 ± 1.03                       | 13.7 ± 1.35  | 76.4 ± 1.62                 | 82.06 ± 0.92 | 86.99 ± 3.07                | 89.64 ± 2.11 |
| Naive NPCL (w/o task head inf.)   | 19.54 ± 3.44                  | 20.71 ± 3.09 | 18.27                          | 18.90 | 7.19 ± 1.02                        | 8.48 ± 0.90  | 68.37 ± 1.58                | 73.3 ± 0.81  | 81.13 ± 2.91                | 83.69 ± 2.24 |
| NPCL (ours)                       | 63.78 ± 1.70                  | 71.34 ± 1.48 | 37.43                          | 46.71 | 12.44 ± 0.59                       | 15.29 ± 1.02 | 83.11 ± 0.90                | 86.52 ± 0.77 | 91.48 ± 1.79                | 92.07 ± 1.39 |

Table 1: Classification accuracy for standard CL benchmarks across 10 runs. Best results are in red. Second best results are in blue. All runs of NP variants in the CL settings rely on ER. S-CIFAR-100 results are reported from Boschini et al. [3] while the rest are taken from Buzzega et al. [4].

## 189 5 Experiments

### 190 5.1 Settings

191 **Datasets.** We evaluate NPCL on class and domain incremental learning (IL) settings. For class-IL, we  
192 use three public datasets: sequential CIFAR10 (S-CIFAR-10) [32], sequential CIFAR100 (S-CIFAR-  
193 100) [48], and sequential Tiny ImageNet (S-Tiny-ImageNet) [6]. For domain-IL, we use Permuted  
194 MNIST (P-MNIST) [27] and Rotated MNIST (R-MNIST) [32]. S-CIFAR-10, S-CIFAR-100, and  
195 S-Tiny-ImageNet host 10, 100, and 200 classes each with 5000, 500, and 500 training images and  
196 1000, 100, and 50 test images per class, respectively. The number of sequential tasks for S-CIFAR-10  
197 is 5 (2 classes per task); for S-CIFAR-100 and S-Tiny-ImageNet is 10 (10 and 20 classes per task,  
198 respectively); for P/R-MNIST is 20 where P-MNIST creates tasks out of MNIST [29] by randomly  
199 permuting the image pixels while R-MNIST does so by rotating images randomly in the range  $[0, \pi)$ .

200 **Architectures.** For a fair comparison against other methods, we rely on the Mammoth CL benchmark  
201 [3]. Our backbone for class-IL experiments is a ResNet-18 [19] without pretraining, while for  
202 domain-IL, we rely on a fully connected (FC) network with two hidden layers [32]. NPCL relies on  
203 Xavier initialized [14] FC layers with: two 256-d hidden layers for class-IL and one 32-d layer for  
204 domain-IL setups. For class-IL, each FC layer is followed by layer normalization [1] and ReLU.

205 **Configuration and Hyperparameters.** We train all models using SGD optimizer. The number  
206 of training epochs per task for S-Tiny-ImageNet is 100, for S-CIFAR-(10/100) is 50 and that for  
207 (P/R)-MNIST is 1. We detail further on configurations, hyperparameters, and their tuning in App. C.

208 **Baselines.** We employ several CL methods to compare NPCL with. Regularization-based methods  
209 include oEWC [39] and SI [48]; knowledge distillation-based methods include iCaRL [37] and LwF  
210 [31]; rehearsal-based methods are ER [38], RPC [36], FDR [2], DER [4]. Among neural processes,  
211 we use NP [13], ANP [24] with only global latent and Single Task (ST) NPCL (see App. A.2)  
212 with only per-task latents. We use five non-CL benchmarks for upper bounds on the performance:  
213 Joint ResNet / NP / ANP / NPCL perform joint training of all tasks using a single task head while  
214 the multitask NPCL infers task heads in joint training using Eq. (9). Finally, Naive NPCL infers  
215 predictions by averaging logits of all task heads.

### 216 5.2 Results

217 Table 1 reports the average accuracy after training on all tasks. Across all settings, NPCL boosts  
218 the performance of ER and achieves either comparable results compared with the state-of-the-art  
219 (SOTA), e.g., DER. Compared to regularization-based oEWC and SI, NPCL obtains a significant gain

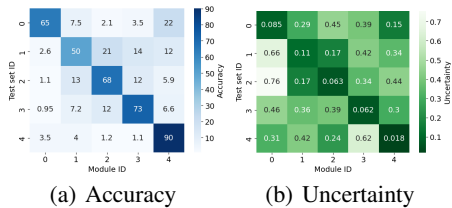

Figure 4: Heatmaps depicting the taskwise averaged accuracy and uncertainty of test samples per task head on S-CIFAR-10.

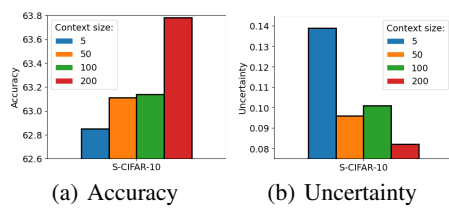

Figure 5: Effect of context set size ( $|\mathcal{M}| = \{5, 50, 100, 200\}$ ) on the accuracy and uncertainty of NPCL on S-CIFAR-10.

220 in performance. This is because the former methods calculate weight importance which is liable to  
 221 changes with new tasks. Regularizing explicitly towards the global and per-task distributions of past  
 222 tasks helps NPCL overcome this. Further, on both class and domain-IL, NPCL stands out in the most  
 223 challenging setting where the episodic memory size is the smallest. On domain-IL where the shift  
 224 occurs within the domain instead of classes, the performance of a number of methods degrade as they  
 225 forget the relations among a task’s classes. Preserving the tasks’ distributions helps NPCL maintain  
 226 valuable information in this case. Analyzing the backward transfer (BWT) scores [34] shows that  
 227 NPCL’s forgetting is competitive or lesser than the SOTA (see Table 8). Lastly, we observe that  
 228 ST-NPCL with no hierarchy lags in BWT and accuracy due to limited knowledge transfer between  
 229 tasks.

### 230 5.3 Ablation Studies

231 **On Learning Objectives.** Table 2 shows the impact  
 232 of distribution regularization with the baseline being  
 233 an NPCL trained with no regularization. We observe  
 234 that the baseline performs worse than the ResNet-based  
 235 ER as the NPCL layers are liable to more forgetting.  
 236 Including TR into our objectives leads to the singlemost  
 237 gain over the baseline. We further study how these  
 238 objectives guide the learning of the global and task-  
 239 specific means and variances with training (see App.  
 240 E.1). We observe that NPCL w/ TR leads to better  
 241 learning of the current task as well as preserving the past task distributions but at the cost of drifting  
 242 the global distribution. NPCL w/ GR restricts the global distribution drift but not for the per-task  
 243 distributions. NPCL w/ GR and TR strikes a balance in between.

244 **On Uncertainty.** Fig. 4 ablates the average accuracies and uncertainties of each task head predictions  
 245 over the test set of each task on S-CIFAR-10 (see App. E.2 for S-CIFAR-100). First, we observe  
 246 that the accuracy of predictions made by true task heads are, in general, a magnitude higher than the  
 247 rest. For uncertainty, this trend is reversed. This verifies our assumption that restricting latent heads  
 248 to learn only their true label distribution makes them more confident in modeling the within-task  
 249 samples. Second, for recently trained tasks, the uncertainty differences between the true task heads  
 250 and the rest are greater than the earlier tasks. This suggests that the extent of forgetting goes beyond  
 251 a model’s accuracy and to other aspects of learning such as its confidence. To further verify this, we  
 252 probe the BWT of uncertainty, and see a strong correlation with the BWT of accuracy (see Fig. 7).

253 **On Context Size.** We study the average accuracy (Fig. 5(a)) and uncertainty (Fig. 5(b)) after training  
 254 on S-CIFAR-10 with  $|\mathcal{M}| = 200$ , and then varying the context sizes during inference. Similar to other  
 255 NPs [44, 11], we find a positive correlation between context size and performance indicating that  
 256 NPCL utilizes useful information from diverse context, thereby reducing its task inference ambiguity.

257 **On Storage Overhead.** For each task, NPCL stores two new vectors – task-specific mean and  
 258 variance, and replaces the global mean and variance with the current global ones. The NPCL storage  
 259 thus scales constantly in the size  $|\mathcal{M}|$  of the memory. This offers a strong edge on storage efficiency  
 260 when compared to the SOTA [4] scaling quadratically, i.e.,  $|\mathcal{M}| * N_C$  where  $N_C$  is the total number  
 261 of classes. For instance, on S-Tiny-ImageNet with  $|\mathcal{M}| = 500$ ,  $|N_C| = 200$ , NPCL’s cumulative  
 262 storage amounts to a (flattened) vector of size 6132 ( $256 * 10 * 2$  for 256-d means and variances of  
 263 10 tasks +  $256 * 2$  for 256-d global mean and variance + 500 for 1-d task labels) while that of DER

| Method                  | S-CIFAR-10   | S-Tiny-ImageNet |
|-------------------------|--------------|-----------------|
| ER                      | 44.79        | 8.49            |
| Baseline (w/o GR or TR) | 32.24        | 7.15            |
| NPCL (w/ only GR)       | 50.68        | 8.61            |
| NPCL (w/ only TR)       | 57.28        | 11.36           |
| NPCL (w/ GR and TR)     | <b>63.78</b> | <b>12.44</b>    |

Table 2: Accuracy w/ learning objectives

264 amounts to 100,000 (200\*500 for logits of 500 memory samples), *i.e.*, a **93.868% storage gain**. We  
 265 report the storage gains of NPCL over DER across all settings in App. E.3.

## 266 5.4 Applications of Uncertainty Quantification

267 The probabilistic nature of NPCL offers it an edge at leveraging data-driven UQMs. To further study  
 268 the usage its predictive uncertainties, we design two experiments that leverage pretrained NPCL.

269 **Novel Data Identification.** Novel data identification seeks to distinguish out-of-distribution  
 270 data ( $\mathcal{D}_{\text{OOD}}$ ) from in-domain data ( $\mathcal{D}_{\text{ID}}$ ). Forgetting makes CL models struggle further on  
 271 the task [18]. The probabilistic sampling in NPCL opens the door for leveraging its predic-  
 272 tive variances – which are more reliable estimates of aleatoric uncertainty than pointwise  
 273 predictions [21]. For the  $N$  predicted logits, we thus compute the variances over their soft-  
 274 max scores,  $\sigma^2(\delta(h_*))$ , and their uncertainty scores,  $\sigma^2(U(h_*))$ . Table 3 evaluates these met-  
 275 rics for ID (S-CIFAR-10) and OOD (first 10 classes of S-CIFAR-100) data after each task. We  
 276 observe that the variance scores of either metrics on  $\mathcal{D}_{\text{ID}}$  are up to a magnitude lower than those  
 277 on  $\mathcal{D}_{\text{OOD}}$ . We further observe an overall decrease in the variances with the arrival of further incre-  
 278 mental tasks. This could be attributed to the generalization of more low-level features in the novel  
 279 data as in-domain [17, 15]. We detail further novel data identification experiments in App. E.4.

### 286 Instance-level Model Confidence Evaluation.

287 The confidence evaluation framework of Han et al. [16] provides finer granularity for assessing the  
 288 predictive confidence of classification models (see App. E.5 for more details and normality test). Ta-  
 289 ble 4 shows the results of one run of the framework after training on S-CIFAR-10 (see App. Table 11  
 290 for all classes). Here, we use the task identity to select the latent head per class. We observe the  
 291 mean prediction interval width (PIW) of the true class label among the correct predictions to be nar-  
 292 rower than that of the incorrect predictions, implying that the NPCL’s variations of predicted class  
 293 labels is smaller when the predictions are correct. We also notice a higher accuracy among the test  
 294 instances rejected by the  $t$ -test than those not rejected.

## 300 6 Limitations

301 We list the key limitations of NPCL to facilitate future research directions. These include:

302 **Incompetence of dot-product attention:** Similar to the ANP [24], NPCL employs the permutation-  
 303 invariant scaled-dot product attention [43] to weigh the relevant context and target embeddings.  
 304 Visualizing the attention weights computed by the cross-attention layers of the deterministic path  
 305 shows us that the top attended context for the target queries often contain points belonging to other  
 306 CL tasks (Fig. 6(a)). This *limits* the performance sensitivity of NPCL with respect to the increase in  
 307 context thus resulting in a lag of accuracy behind SOTA on CL setups with larger episodic memory  
 308 sizes (see Table 1). To further verify the relevance of the attended context, we visualize the self-  
 309 attention weights of all context points. Fig. 6(b) shows that the lowest or the maximum values in the  
 310 context dataset have larger weights. Such an observation is in line with existing works pointing that  
 311 the scaled-dot product attention can derive irrelevant set encodings of the context points and can thus  
 312 lag at exploiting the context embeddings properly [25].

313 **Computational overhead:** Table 5 compares the number of parameters of the NPCL with ER / DER  
 314 [3] where the latter rely solely on the ResNet-18 backbone as they do not exploit parameter isolation

| Incremental step | $\mathcal{D}_{\text{ID}} = \text{CIFAR-10}, \mathcal{D}_{\text{OOD}} = \text{CIFAR-100}$ |                                     |                               |                                |
|------------------|------------------------------------------------------------------------------------------|-------------------------------------|-------------------------------|--------------------------------|
|                  | $\mathcal{D}_{\text{ID}} (\delta)$                                                       | $\mathcal{D}_{\text{OOD}} (\delta)$ | $\mathcal{D}_{\text{ID}} (H)$ | $\mathcal{D}_{\text{OOD}} (H)$ |
| 1                | $1e^{-6}$                                                                                | $1e^{-5}$                           | $9.3e^{-6}$                   | $8.4e^{-5}$                    |
| 2                | $2.6e^{-6}$                                                                              | $1.4e^{-5}$                         | $6.3e^{-5}$                   | $2.2e^{-4}$                    |
| 3                | $2.3e^{-6}$                                                                              | $6.2e^{-6}$                         | $6.7e^{-5}$                   | $2.1e^{-4}$                    |
| 4                | $8.1e^{-7}$                                                                              | $4.8e^{-6}$                         | $4.6e^{-5}$                   | $2.2e^{-4}$                    |
| 5                | $7.1e^{-7}$                                                                              | $1.7e^{-6}$                         | $4.6e^{-5}$                   | $1.1e^{-4}$                    |

Table 3: Average variances over softmax ( $\delta$ ) and entropy ( $H$ ) scores on in- and out-of-domain test sets using  $N = 50$  ancestral samples.

| Class | Accuracy | PIW     |           | Accuracy by $t$ -test status |              |
|-------|----------|---------|-----------|------------------------------|--------------|
|       |          | Correct | Incorrect | Rejected                     | Not Rejected |
| 1     | 82.30    | 74.17   | 102.21    | 83.37                        | 50.00        |
| 2     | 94.00    | 62.90   | 79.86     | 94.07                        | 80.00        |
| 3     | 74.00    | 54.92   | 68.48     | 74.14                        | 64.29        |

Table 4: PIW (multiplied by 100) and  $t$ -test results for the first three classes of S-CIFAR-10 inferred from their respective task heads.



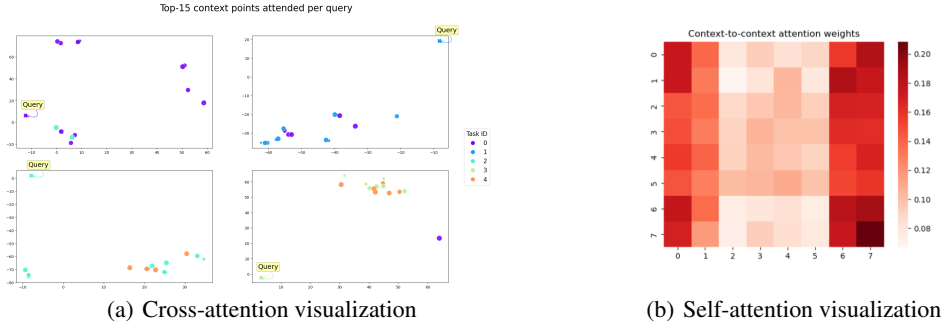

Figure 6: **Scaled dot-product attention visualization:** (a) top-15 context (buffer) points attended for 4 randomly chosen queries (test set samples). The queries are made after training on S-CIFAR-10. The sizes of the points correspond to the attention values while the colors denote the tasks they belong to. (b) self-attention weights of context points when all feature values are arranged in ascending order shows that ANP [24] mostly attends to the lowest or the maximum values in the context dataset.

315 for task heads. Overall, the percentage increase in parameter number is 57.6% for S-CIFAR-10,  
 316 46.57% for S-CIFAR-100 and S-Tiny-ImageNet, and 55.25% for P/R-MNIST.

| Method / Dataset | S-CIFAR-10 | S-CIFAR-100 | S-Tiny-ImageNet | P/R-MNIST |
|------------------|------------|-------------|-----------------|-----------|
| ER / DER [1]     | 11,173,962 | 11,220,132  | 11,220,132      | 89,610    |
| NPCL             | 19,397,706 | 24,091,556  | 24,091,556      | 162,166   |

Table 5: Comparison of the total number of parameters for ER / DER against NPCL.

317 **Inference time complexity:** The reliance on self-attention  
 318 means that the inference time complexity of NPCL is  $\mathcal{O}(n * m)$   
 319 where,  $n$  is the number of context points (sampled from the  
 320 episodic memory) and  $m$  is the number of target points (the num-  
 321 ber of test samples). Due to this, the runtime for inference scales  
 322 polynomially with the number of context points (sampled from  
 323 the buffer). Table 6 reports the runtime of NPCL on S-CIFAR-  
 324 10 and S-CIFAR-100 settings by varying the context sizes. For  
 325 reference, the first row reports the runtime of ER / DER whose  
 326 inference complexity is  $O(1)$  in the memory buffer size.

| Method                       | S-CIFAR-10 |
|------------------------------|------------|
| ER / DER                     | 3.72s      |
| NPCL, $ \mathcal{M}  = 200$  | 19.58s     |
| NPCL, $ \mathcal{M}  = 500$  | 31.25s     |
| NPCL, $ \mathcal{M}  = 1000$ | 47.99s     |
| NPCL, $ \mathcal{M}  = 2000$ | 84.86s     |

Table 6: Inference time with varying context sizes

327 **Incompatibility with logits-based replay:** NPCL is incompatible with logits based replay because  
 328 of the stochasticity in the posterior induced by Monte Carlo sampling. Overcoming this could help  
 329 boost the performance of NPCL further over SOTA like DER [4] and DER++ [3].

## 330 7 Conclusion

331 In this paper, we propose neural processes for continual learning (NPCL), a hierarchical latent  
 332 variable setup designed to jointly model the task-agnostic and task-specific data generating functions  
 333 in CL. We study the potential forgetting aspects in NPCL and propose to regularize the previously  
 334 learned distributions at a global and a per-task granularity. We further demonstrate that using entropy  
 335 as an uncertainty quantification metric (UQM) helps NPCL infer correct task heads and boost the  
 336 performance of baseline experience replay to even surpass state-of-the-art deterministic models  
 337 on several CL settings. We further show out-of-the-box applications of the uncertainty estimation  
 338 capabilities of NPCL for novel data identification and instance-level confidence evaluation. We  
 339 conclude our ablations by listing the key limitations of NPCL, which we hope could lay solid  
 340 directions for further research on uncertainty-aware CL.

## References

- [1] Jimmy Lei Ba, Jamie Ryan Kiros, and Geoffrey E Hinton. Layer normalization. 2016.
- [2] Ari Benjamin, David Rolnick, and Konrad Kording. Measuring and regularizing networks in function space. In *International Conference on Learning Representations*, 2018.
- [3] Matteo Boschini, Lorenzo Bonicelli, Pietro Buzzega, Angelo Porrello, and Simone Calderara. Class-incremental continual learning into the extended der-verse. *IEEE Transactions on Pattern Analysis and Machine Intelligence*, 2022.
- [4] Pietro Buzzega, Matteo Boschini, Angelo Porrello, Davide Abati, and SIMONE CALDERARA. Dark experience for general continual learning: a strong, simple baseline. In H. Larochelle, M. Ranzato, R. Hadsell, M.F. Balcan, and H. Lin, editors, *Advances in Neural Information Processing Systems*, volume 33, pages 15920–15930. Curran Associates, Inc., 2020. URL <https://proceedings.neurips.cc/paper/2020/file/b704ea2c39778f07c617f6b7ce480e9e-Paper.pdf>.
- [5] Arslan Chaudhry, Marc’Aurelio Ranzato, Marcus Rohrbach, and Mohamed Elhoseiny. Efficient lifelong learning with a-GEM. In *International Conference on Learning Representations*, 2019. URL [https://openreview.net/forum?id=Hkf2\\_sC5FX](https://openreview.net/forum?id=Hkf2_sC5FX).
- [6] Arslan Chaudhry, Marcus Rohrbach, Mohamed Elhoseiny, Thalaiyasingam Ajanthan, Puneet K Dokania, Philip HS Torr, and Marc’Aurelio Ranzato. On tiny episodic memories in continual learning. *arXiv preprint arXiv:1902.10486*, 2019.
- [7] Arslan Chaudhry, Naeemullah Khan, Puneet Dokania, and Philip Torr. Continual learning in low-rank orthogonal subspaces. *Advances in Neural Information Processing Systems*, 33: 9900–9911, 2020.
- [8] Arthur Douillard, Alexandre Ramé, Guillaume Couairon, and Matthieu Cord. Dytox: Transformers for continual learning with dynamic token expansion. In *Proceedings of the IEEE/CVF Conference on Computer Vision and Pattern Recognition*, pages 9285–9295, 2022.
- [9] Xinjie Fan, Shujian Zhang, Korawat Tanwisuth, Xiaoning Qian, and Mingyuan Zhou. Contextual dropout: An efficient sample-dependent dropout module. In *International Conference on Learning Representations*, 2021. URL [https://openreview.net/forum?id=ct8\\_a9h1M](https://openreview.net/forum?id=ct8_a9h1M).
- [10] Bent Fuglede and Flemming Topsøe. Jensen-shannon divergence and hilbert space embedding. In *International Symposium on Information Theory, 2004. ISIT 2004. Proceedings.*, page 31. IEEE, 2004.
- [11] Ning Gao, Hanna Ziesche, Ngo Anh Vien, Michael Volpp, and Gerhard Neumann. What matters for meta-learning vision regression tasks? In *Proceedings of the IEEE/CVF Conference on Computer Vision and Pattern Recognition*, pages 14776–14786, 2022.
- [12] Marta Garnelo, Dan Rosenbaum, Christopher Maddison, Tiago Ramalho, David Saxton, Murray Shanahan, Yee Whye Teh, Danilo Rezende, and SM Ali Eslami. Conditional neural processes. In *International Conference on Machine Learning*, pages 1704–1713. PMLR, 2018.
- [13] Marta Garnelo, Jonathan Schwarz, Dan Rosenbaum, Fabio Viola, Danilo J Rezende, SM Eslami, and Yee Whye Teh. Neural processes. *arXiv preprint arXiv:1807.01622*, 2018.
- [14] Xavier Glorot and Yoshua Bengio. Understanding the difficulty of training deep feedforward neural networks. In *Proceedings of the thirteenth international conference on artificial intelligence and statistics*, pages 249–256. JMLR Workshop and Conference Proceedings, 2010.
- [15] Chuan Guo, Geoff Pleiss, Yu Sun, and Kilian Q Weinberger. On calibration of modern neural networks. In *International conference on machine learning*, pages 1321–1330. PMLR, 2017.
- [16] Xizewen Han, Huangjie Zheng, and Mingyuan Zhou. CARD: Classification and regression diffusion models. In Alice H. Oh, Alekh Agarwal, Danielle Belgrave, and Kyunghyun Cho, editors, *Advances in Neural Information Processing Systems*, 2022. URL [https://openreview.net/forum?id=4L2zYEJ9d\\_](https://openreview.net/forum?id=4L2zYEJ9d_).

- 389 [17] Jakob D Havtorn, Jes Frellsen, Søren Hauberg, and Lars Maaløe. Hierarchical vaes know what  
390 they don't know. In *International Conference on Machine Learning*, pages 4117–4128. PMLR,  
391 2021.
- 392 [18] Jiangpeng He and Fengqing Zhu. Out-of-distribution detection in unsupervised continual  
393 learning. In *Proceedings of the IEEE/CVF Conference on Computer Vision and Pattern  
394 Recognition*, pages 3850–3855, 2022.
- 395 [19] Kaiming He, Xiangyu Zhang, Shaoqing Ren, and Jian Sun. Deep residual learning for image  
396 recognition. In *Proceedings of the IEEE conference on computer vision and pattern recognition*,  
397 pages 770–778, 2016.
- 398 [20] Dan Hendrycks and Kevin Gimpel. A baseline for detecting misclassified and out-of-distribution  
399 examples in neural networks. In *International Conference on Learning Representations*, 2017.  
400 URL <https://openreview.net/forum?id=Hkg4TI9x1>.
- 401 [21] Eyke Hüllermeier and Willem Waegeman. Aleatoric and epistemic uncertainty in machine  
402 learning: An introduction to concepts and methods. *Machine Learning*, 110:457–506, 2021.
- 403 [22] Saurav Jha, Dong Gong, Xuesong Wang, Richard E Turner, and Lina Yao. The neural process  
404 family: Survey, applications and perspectives. *arXiv preprint arXiv:2209.00517*, 2022.
- 405 [23] Donggyun Kim, Seongwoong Cho, Wonkwang Lee, and Seunghoon Hong. Multi-task processes.  
406 In *International Conference on Learning Representations*, 2022. URL <https://openreview.net/forum?id=9otKV1grpZG>.
- 408 [24] Hyunjik Kim, Andriy Mnih, Jonathan Schwarz, Marta Garnelo, Ali Eslami, Dan Rosenbaum,  
409 Oriol Vinyals, and Yee Whye Teh. Attentive neural processes. In *International Conference on  
410 Learning Representations*, 2019. URL <https://openreview.net/forum?id=SkE6PjC9KX>.
- 411 [25] Mingyu Kim, Kyeong Ryeol Go, and Se-Young Yun. Neural processes with stochastic atten-  
412 tion: Paying more attention to the context dataset. In *International Conference on Learning  
413 Representations*, 2022. URL <https://openreview.net/forum?id=JPkQwEdYn8>.
- 414 [26] Durk P Kingma, Tim Salimans, and Max Welling. Variational dropout and the local reparameter-  
415 ization trick. *Advances in neural information processing systems*, 28, 2015.
- 416 [27] James Kirkpatrick, Razvan Pascanu, Neil Rabinowitz, Joel Veness, Guillaume Desjardins,  
417 Andrei A Rusu, Kieran Milan, John Quan, Tiago Ramalho, Agnieszka Grabska-Barwinska, et al.  
418 Overcoming catastrophic forgetting in neural networks. *Proceedings of the national academy of  
419 sciences*, 114(13):3521–3526, 2017.
- 420 [28] Yann LeCun. A path towards autonomous machine intelligence version 0.9. 2, 2022-06-27.  
421 *Open Review*, 62, 2022.
- 422 [29] Yann LeCun, Corinna Cortes, and CJ Burges. Mnist handwritten digit database. *ATT Labs  
423 [Online]*. Available: <http://yann.lecun.com/exdb/mnist>, 2, 2010.
- 424 [30] Xilai Li, Yingbo Zhou, Tianfu Wu, Richard Socher, and Caiming Xiong. Learn to grow: A  
425 continual structure learning framework for overcoming catastrophic forgetting. In *International  
426 Conference on Machine Learning*, pages 3925–3934. PMLR, 2019.
- 427 [31] Zhizhong Li and Derek Hoiem. Learning without forgetting. *IEEE transactions on pattern  
428 analysis and machine intelligence*, 40(12):2935–2947, 2017.
- 429 [32] David Lopez-Paz and Marc Aurelio Ranzato. Gradient episodic memory for continual learning.  
430 *Advances in neural information processing systems*, 30, 2017.
- 431 [33] Martial Mermillod, Aurélie Bugaïska, and Patrick Bonin. The stability-plasticity dilemma:  
432 Investigating the continuum from catastrophic forgetting to age-limited learning effects, 2013.
- 433 [34] Guy Oren and Lior Wolf. In defense of the learning without forgetting for task incremental  
434 learning. In *Proceedings of the IEEE/CVF International Conference on Computer Vision*, pages  
435 2209–2218, 2021.

- 436 [35] Razvan Pascanu, Tomas Mikolov, and Yoshua Bengio. On the difficulty of training recurrent  
437 neural networks. In *International conference on machine learning*, pages 1310–1318. PMLR,  
438 2013.
- 439 [36] Federico Pernici, Matteo Bruni, Claudio Baccchi, Francesco Turchini, and Alberto Del Bimbo.  
440 Class-incremental learning with pre-allocated fixed classifiers. In *2020 25th International  
441 Conference on Pattern Recognition (ICPR)*, pages 6259–6266. IEEE, 2021.
- 442 [37] Sylvestre-Alvise Rebuffi, Alexander Kolesnikov, Georg Sperl, and Christoph H Lampert. icarl:  
443 Incremental classifier and representation learning. In *Proceedings of the IEEE conference on  
444 Computer Vision and Pattern Recognition*, pages 2001–2010, 2017.
- 445 [38] Matthew Riemer, Ignacio Cases, Robert Ajemian, Miao Liu, Irina Rish, Yuhai Tu, , and  
446 Gerald Tesauro. Learning to learn without forgetting by maximizing transfer and minimizing  
447 interference. In *International Conference on Learning Representations*, 2019. URL <https://openreview.net/forum?id=B1gTShAct7>.  
448
- 449 [39] Jonathan Schwarz, Wojciech Czarnecki, Jelena Luketina, Agnieszka Grabska-Barwinska,  
450 Yee Whye Teh, Razvan Pascanu, and Raia Hadsell. Progress & compress: A scalable framework  
451 for continual learning. In *International Conference on Machine Learning*, pages 4528–4537.  
452 PMLR, 2018.
- 453 [40] Claude Elwood Shannon. A mathematical theory of communication. *The Bell system technical  
454 journal*, 27(3):379–423, 1948.
- 455 [41] Casper Kaae Sønderby, Tapani Raiko, Lars Maaløe, Søren Kaae Sønderby, and Ole Winther.  
456 Ladder variational autoencoders. *Advances in neural information processing systems*, 29, 2016.
- 457 [42] Gido M van de Ven, Tinne Tuytelaars, and Andreas S Tolias. Three types of incremental  
458 learning. *Nature Machine Intelligence*, pages 1–13, 2022.
- 459 [43] Ashish Vaswani, Noam Shazeer, Niki Parmar, Jakob Uszkoreit, Llion Jones, Aidan N Gomez,  
460 Łukasz Kaiser, and Illia Polosukhin. Attention is all you need. *Advances in neural information  
461 processing systems*, 30, 2017.
- 462 [44] Jianfeng Wang, Thomas Lukasiewicz, Daniela Massiceti, Xiaolin Hu, Vladimir Pavlovic, and  
463 Alexandros Neophytou. Np-match: When neural processes meet semi-supervised learning. In  
464 *International Conference on Machine Learning*, pages 22919–22934. PMLR, 2022.
- 465 [45] Qi Wang and Herke Van Hoof. Doubly stochastic variational inference for neural processes  
466 with hierarchical latent variables. In *International Conference on Machine Learning*, pages  
467 10018–10028. PMLR, 2020.
- 468 [46] Qingsen Yan, Dong Gong, Yuhang Liu, Anton van den Hengel, and Javen Qinfeng Shi. Learning  
469 bayesian sparse networks with full experience replay for continual learning. In *Proceedings of  
470 the IEEE/CVF Conference on Computer Vision and Pattern Recognition*, pages 109–118, 2022.
- 471 [47] Jaehong Yoon, Eunho Yang, Jeongtae Lee, and Sung Ju Hwang. Lifelong learning with  
472 dynamically expandable networks. In *International Conference on Learning Representations*,  
473 2018. URL <https://openreview.net/forum?id=Sk7KsfW0->.
- 474 [48] Friedemann Zenke, Ben Poole, and Surya Ganguli. Continual learning through synaptic  
475 intelligence. In *International Conference on Machine Learning*, pages 3987–3995. PMLR,  
476 2017.
- 477 [49] Guodong Zhang, Shengyang Sun, David Duvenaud, and Roger Grosse. Noisy natural gradient  
478 as variational inference. In *International conference on machine learning*, pages 5852–5861.  
479 PMLR, 2018.

## 480 A Theory

### 481 A.1 ELBO derivation for NPCL

482 Borrowing the conventions from section 3, for an incremental task  $0 \leq t \leq T$ , we assume the context  
 483  $\mathcal{C}$  and targets  $\mathcal{T}$  to comprise of samples from all  $t$  seen classes. Accordingly, we define these as  
 484  $\mathcal{C} = (X_{\mathcal{C}}^{0:t}, Y_{\mathcal{C}}^{0:t})$  and  $\mathcal{T} = (X_{\mathcal{T}}^{0:t}, Y_{\mathcal{T}}^{0:t})$ , respectively. To enforce the prior that both  $\mathcal{C}$  and  $\mathcal{T}$  follow  
 485 the same distribution, we assume  $\mathcal{C}^t \subset \mathcal{T}^t$ , and therefore,  $\mathcal{C} \subset \mathcal{T}$ . In order to derive predictions  $Y_{\mathcal{T}}^{0:t}$   
 486 on  $X_{\mathcal{T}}^{0:t}$ , the NPCL relies on the context  $\mathcal{C}$  to build conditional priors  $p_{\theta}(z^G|\mathcal{C})$  and  $p_{\theta}(z^t|z^G, \mathcal{C}^t)$ ,  
 487 where  $p_{\theta}$  is the decoder. The decoder’s objective thus boils down to maximizing the log-likelihood  
 488 of the observations, *i.e.*, the evidence  $\log p_{\theta}(Y_{\mathcal{T}}^{0:t}|X_{\mathcal{T}}^{0:t}, \mathcal{C})$ . In what follows, we derive the evidence  
 489 lower bound (ELBO):

$$\begin{aligned}
 & \log p_{\theta}(Y_{\mathcal{T}}^{0:t}|X_{\mathcal{T}}^{0:t}, \mathcal{C}) && \text{(Log-likelihood of evidence)} \\
 & && (10a) \\
 & = \log p_{\theta}(Y_{\mathcal{T}}^{0:t}|X_{\mathcal{T}}^{0:t}, \mathcal{C}) \int p_{\theta}(z^G|X_{\mathcal{T}}^{0:t}, Y_{\mathcal{T}}^{0:t}, \mathcal{C}) dz^G && (\because \int p_{\theta}(z^G|\mathcal{T}, \mathcal{C}) dz^G = 1) \\
 & && (10b) \\
 & = \int p_{\theta}(z^G|X_{\mathcal{T}}^{0:t}, Y_{\mathcal{T}}^{0:t}, \mathcal{C}) (\log p_{\theta}(Y_{\mathcal{T}}^{0:t}|X_{\mathcal{T}}^{0:t}, \mathcal{C})) dz^G && \text{(Integrate over the log-likelihood)} \\
 & && (10c) \\
 & = \mathbb{E}_{q_{\phi}(z^G|\mathcal{T})} [\log p_{\theta}(Y_{\mathcal{T}}^{0:t}|X_{\mathcal{T}}^{0:t}, \mathcal{C})] && \text{(By definition)} \\
 & && (10d) \\
 & = \mathbb{E}_{q_{\phi}(z^G|\mathcal{T})} \left[ \log \frac{p_{\theta}(Y_{\mathcal{T}}^{0:t}, z^G|X_{\mathcal{T}}^{0:t}, \mathcal{C})}{p_{\theta}(z^G|X_{\mathcal{T}}^{0:t}, Y_{\mathcal{T}}^{0:t}, \mathcal{C})} \right] && \text{(Re-introduce } z^G \text{ by Chain rule)} \\
 & && (10e) \\
 & = \mathbb{E}_{q_{\phi}(z^G|\mathcal{T})} \left[ \log \frac{p_{\theta}(Y_{\mathcal{T}}^{0:t}|X_{\mathcal{T}}^{0:t}, \mathcal{C}, z^G) p_{\theta}(z^G|X_{\mathcal{T}}^{0:t}, \mathcal{C})}{p_{\theta}(z^G|\mathcal{T})} \right] && \text{(Chain rule of probability; } \mathcal{C} \subset \mathcal{T}) \\
 & && (10f) \\
 & = \mathbb{E}_{q_{\phi}(z^G|\mathcal{T})} \left[ \log \frac{p_{\theta}(Y_{\mathcal{T}}^{0:t}|X_{\mathcal{T}}^{0:t}, \mathcal{C}, z^G) p_{\theta}(z^G|X_{\mathcal{T}}^{0:t}, \mathcal{C}) q_{\phi}(z^G|\mathcal{T})}{p_{\theta}(z^G|\mathcal{T}) q_{\phi}(z^G|\mathcal{T})} \right] && \text{(Equivalent fraction)} \\
 & && (10g) \\
 & = \mathbb{E}_{q_{\phi}(z^G|\mathcal{T})} \left[ \log p_{\theta}(Y_{\mathcal{T}}^{0:t}|X_{\mathcal{T}}^{0:t}, \mathcal{C}, z^G) \right] && \\
 & \quad + \mathbb{E}_{q_{\phi}(z^G|\mathcal{T})} \left[ \log \frac{p_{\theta}(z^G|\mathcal{C})}{q_{\phi}(z^G|\mathcal{T})} \right] + \mathbb{E}_{q_{\phi}(z^G|\mathcal{T})} \left[ \log \frac{q_{\phi}(z^G|\mathcal{T})}{p_{\theta}(z^G|\mathcal{T})} \right] && \text{(Split the expectation)} \\
 & && (10h) \\
 & = \mathbb{E}_{q_{\phi}(z^G|\mathcal{T})} \left[ \log p_{\theta}(Y_{\mathcal{T}}^{0:t}|X_{\mathcal{T}}^{0:t}, \mathcal{C}, z^G) \right] && \\
 & \quad - D_{\text{KL}}(q_{\phi}(z^G|\mathcal{T}) \| p_{\theta}(z^G|\mathcal{C})) + D_{\text{KL}}(q_{\phi}(z^G|\mathcal{T}) \| p_{\theta}(z^G|\mathcal{T})) && \text{(By definition of KL divergence)} \\
 & && (10i) \\
 & \geq \mathbb{E}_{q_{\phi}(z^G|\mathcal{T})} \left[ \log p_{\theta}(Y_{\mathcal{T}}^{0:t}|X_{\mathcal{T}}^{0:t}, \mathcal{C}, z^G) \right] - D_{\text{KL}}(q_{\phi}(z^G|\mathcal{T}) \| p_{\theta}(z^G|\mathcal{C})) && (\because \text{KL divergence for posterior approximation} \geq 0) \\
 & && (10j)
 \end{aligned}$$

490 where the evidence is equal to the sum of the reconstruction likelihood  
 491  $\mathbb{E}_{q_{\phi}(z^G|\mathcal{T})} [\log p_{\theta}(Y_{\mathcal{T}}^{0:t}|X_{\mathcal{T}}^{0:t}, \mathcal{C}, z^G)]$  of the decoder and the KL divergence between the true  
 492 posterior  $p_{\theta}(z^G|\mathcal{T})$  and the approximate posterior  $q_{\phi}(z^G|\mathcal{T})$  learned using the variational distribu-  
 493 tion, minus the prior matching term  $D_{\text{KL}}(q_{\phi}(z^G|\mathcal{T}) \| p_{\theta}(z^G|\mathcal{C}))$ . In particular, NPCL learns two  
 494 approximate distributions  $q_{\phi}(z^G|\mathcal{T})$  and  $q_{\phi}(z^t|z^G, \mathcal{T}^t)$ , that seek to estimate the global posterior  
 495  $p_{\theta}(z^G|\mathcal{T})$  and the task-specific posterior  $p_{\theta}(z^t|z^G, \mathcal{T}^t)$ . To realize the latter posterior, we introduce  
 496 the hierarchy of task-specific latents  $z^{0:t}$ . This allows us to expand and derive a lower bound to the  
 497 reconstruction likelihood as:

$$\begin{aligned}
& \log p_\theta(Y_{\mathcal{T}}^{0:t} | X_{\mathcal{T}}^{0:t}, \mathcal{C}, z^G) && \text{(Reconstruction term)} \\
& && (11a) \\
& = \mathbb{E}_{\Pi_0^t q_\phi(z^t | z^G, \mathcal{T}^t)} \left[ \log \frac{p_\theta(Y_{\mathcal{T}}^{0:t}, z^{0:t} | X_{\mathcal{T}}^{0:t}, \mathcal{C}, z^G)}{p_\theta(z^{0:t} | X_{\mathcal{T}}^{0:t}, Y_{\mathcal{T}}^{0:t}, \mathcal{C}, z^G)} \right] && \text{(Introduce one-level latent hierarchy)} \\
& && (11b) \\
& = \mathbb{E}_{\Pi_0^t q_\phi(z^t | z^G, \mathcal{T}^t)} \left[ \log \int_0^t \frac{p_\theta(Y_{\mathcal{T}}^t, z^t | X_{\mathcal{T}}^t, \mathcal{C}^t, z^G)}{p_\theta(z^t | X_{\mathcal{T}}^t, Y_{\mathcal{T}}^t, \mathcal{C}^t, z^G)} \right] && \text{(Integrate over individual tasks)} \\
& && (11c) \\
& = \int_0^t \mathbb{E}_{q_\phi(z^t | z^G, \mathcal{T}^t)} \left[ \log \frac{p_\theta(Y_{\mathcal{T}}^t | X_{\mathcal{T}}^t, \mathcal{C}^t, z^G, z^t) p_\theta(z^t | X_{\mathcal{T}}^t, \mathcal{C}^t, z^G)}{p_\theta(z^t | \mathcal{T}^t, z^G)} \right] && \text{(Chain rule of probability; } \mathcal{C} \subset \mathcal{T} \text{)} \\
& && (11d) \\
& = \int_0^t \mathbb{E}_{q_\phi(z^t | z^G, \mathcal{T}^t)} \left[ \log \frac{p_\theta(Y_{\mathcal{T}}^t | X_{\mathcal{T}}^t, z^t) p_\theta(z^t | \mathcal{C}^t, z^G) q_\phi(z^t | z^G, \mathcal{T}^t)}{p_\theta(z^t | \mathcal{T}^t, z^G) q_\phi(z^t | z^G, \mathcal{T}^t)} \right] && \text{(Equivalent fraction)} \\
& && (11e) \\
& = \int_0^t \mathbb{E}_{q_\phi(z^t | z^G, \mathcal{T}^t)} \left[ \log p_\theta(Y_{\mathcal{T}}^t | X_{\mathcal{T}}^t, z^t) \right. \\
& \quad \left. - D_{\text{KL}}(q_\phi(z^t | z^G, \mathcal{T}^t) \| p_\theta(z^t | z^G, \mathcal{C}^t)) + D_{\text{KL}}(q_\phi(z^t | z^G, \mathcal{T}^t) \| p_\theta(z^t | z^G, \mathcal{T}^t)) \right] && \text{(By definition of KL divergence)} \\
& && (11f) \\
& \geq \int_0^t \mathbb{E}_{q_\phi(z^t | z^G, \mathcal{T}^t)} \left[ \log p_\theta(Y_{\mathcal{T}}^t | X_{\mathcal{T}}^t, z^t) \right] - D_{\text{KL}}(q_\phi(z^t | z^G, \mathcal{T}^t) \| p_\theta(z^t | z^G, \mathcal{C}^t)) && (\because \text{KL divergence} \geq 0) \\
& && (11g)
\end{aligned}$$

498 Plugging Eq. (11g) into Eq. (10j), we get the final ELBO:

$$\begin{aligned}
& \log p_\theta(Y_{\mathcal{T}}^{0:t} | X_{\mathcal{T}}^{0:t}, \mathcal{C}) && (12a) \\
& \geq \mathbb{E}_{q_\phi(z^G | \mathcal{T})} \left[ \int_0^t \mathbb{E}_{q_\phi(z^t | z^G, \mathcal{T}^t)} \left[ \log p_\theta(Y_{\mathcal{T}}^t | X_{\mathcal{T}}^t, z^t) \right] - D_{\text{KL}}(q_\phi(z^t | z^G, \mathcal{T}^t) \| p_\theta(z^t | z^G, \mathcal{C}^t)) \right] \\
& \quad - D_{\text{KL}}(q_\phi(z^G | \mathcal{T}) \| p_\theta(z^G | \mathcal{C})) && \text{(By substitution)} \\
& && (12b) \\
& = \mathbb{E}_{q_\phi(z^G | \mathcal{T})} \left[ \int_0^t \mathbb{E}_{q_\phi(z^t | z^G, \mathcal{T}^t)} \left[ \log p_\theta(Y_{\mathcal{T}}^t | X_{\mathcal{T}}^t, z^t) \right] - D_{\text{KL}}(q_\phi(z^t | z^G, \mathcal{T}^t) \| q_\phi(z^t | z^G, \mathcal{C}^t)) \right] \\
& \quad - D_{\text{KL}}(q_\phi(z^G | \mathcal{T}) \| q_\phi(z^G | \mathcal{C})), && \text{(Final ELBO)} \\
& && (12c)
\end{aligned}$$

499 where the decoder  $p_\theta$  serves as the conditional prior network and is replaced by the encoder  $q_\phi$  serving  
500 as the surrogate posterior network.  $q_\phi$  can be seen to be producing two intermediate bottleneck  
501 distributions: (a)  $q_\phi(z^G | \mathcal{T})$  transforms inputs into a distribution over global latents, (b) conditioned  
502 on the global latents,  $q_\phi(z^t | z^G, \mathcal{T}^t)$  gathers the  $t$ -th task inputs and learns another distribution over  
503 the task-specific latents. The task-specific latents and their corresponding input covariates  $X^t$  are  
504 then used by the deterministic decoder  $p_\theta$  to decode their corresponding logit  $h_*$ . It is indeed this  
505 dependency of  $p_\theta$  on the task identifier  $t$  that makes inference a challenging task in real-world CL  
506 settings.

## 507 A.2 Single Task NPCL and its ELBO

508 Single Task (ST) NPCL preserves all but the inter-task cross attention  $C A_{\text{lat}}^{0:t}$  and the global distribu-  
509 tion encoder  $\psi^G$  layers from the architecture of NPCL (section 4.3). The task-specific latents  $z^t$  are  
510 thus derived as:

$$\{z_i^t\}_{i=1}^M \sim \mathcal{N}(\psi_\mu^t(s_i^t), \psi_\sigma^t(s_i^t)) = \mathcal{N}(\mu_t, \sigma_t^2), \forall t \in T, \quad (13)$$

511 where  $s_i^t$  and  $\psi^t$  carry the same meaning as in Eq. (16). For a fair comparison in Table 1, we fix  $M$   
512 to be the same as the total number of global ancestral samples  $N$  in NPCL. The corresponding ELBO

513 amounts to:

$$\log p_\theta(Y_{\mathcal{T}}^{0:t} | X_{\mathcal{T}}^{0:t}, \mathcal{C}) \quad (14a)$$

$$\geq \int_0^t \mathbb{E}_{q_\phi(z^t | \mathcal{T}^t)} \left[ \log p_\theta(Y_{\mathcal{T}}^t | X_{\mathcal{T}}^t, z^t) \right] - D_{\text{KL}}(q_\phi(z^t | \mathcal{T}^t) \| p_\theta(z^t | \mathcal{C}^t)) \quad (\text{Dropping } z^G \text{ from Eq. (12c)}) \quad (14b)$$

### 514 A.3 ELBO for NP and ANP

515 NP [13] and ANP [24] employ a single latent variable  $z^G$  to model the global correlation of all tasks.  
 516 In particular, compared to section 4.3, the task-specific self-attention layer  $SA_{\text{lat}}^t$  and the task-specific  
 517 distribution encoder  $\psi^t$  is no longer required. While this enables knowledge sharing among tasks,  
 518 NPs and ANPs are limited in modeling finer intra-task stochastic factors. The ELBO can be given as:

$$\log p_\theta(Y_{\mathcal{T}}^{0:t} | X_{\mathcal{T}}, \mathcal{C}) \quad (15a)$$

$$\geq \mathbb{E}_{q_\phi(z^G | \mathcal{T})} \left[ \log p_\theta(Y_{\mathcal{T}}^{0:t} | X_{\mathcal{T}}, z^G) \right] - D_{\text{KL}}(q_\phi(z^G | \mathcal{T}) \| p_\theta(z^G | \mathcal{C})) \quad (\text{Dropping } z^{0:t} \text{ from Eq. (12c)}) \quad (15b)$$

519 where  $z^G$  is derived in a way similar to Eq. (16), and the inputs  $X_{\mathcal{T}}$  and  $\mathcal{C}$  belong to  $[0, t]$  tasks  
 520 without relying on the task labels for being encoded.

## 521 B Further on NPCL Architecture

522 In the following, we denote multi-head dot product self-attention [43] by  $SA(K, V, Q)$  where  $K$ ,  $V$ ,  
 523 and  $Q$  are the keys, values and queries respectively. The equivalent notation for cross-attention is  
 524  $CA(K, V, Q)$ .

525 **Latent Encoder.** The latent path learns the functional prior and posterior from the context and the  
 526 target sets, respectively. Each label-concatenated input is projected as  $\Phi_i^{\text{lat}} = \text{MLP}([x_i; y_i])$ ; then  
 527 subjected to two attention operations. First, per-task projections form the keys, values and queries to  
 528 taskwise self-attention layers  $SA_{\text{lat}}^t(\Phi_i^{\text{lat}}, \Phi_i^{\text{lat}}, \Phi_i^{\text{lat}}) : \Phi_i^{\text{lat}} \rightarrow s_i^t$  that produce order-invariant encodings  
 529  $s_i^t$  over the task  $t$ . Second, all encodings  $\{s_i^{0:t}\}_{i=1}^{n+m}$  serve as the keys, values and queries to the  
 530 cross-attention layers  $CA_{\text{lat}}^{0:t}(s_i^t, s_i^t, s_i^t) : s_i^t \rightarrow s_i^G$  that enrich their order-invariance from intra-task  
 531  $s^t$  to inter-task  $s^G$ .  $s^t$  and  $s^G$  are then used to derive the global  $z^G$  and the task-specific latents  $z^t$ :

532 Such globally attended inputs are passed in parallel to two MLP layers constituting the global  
 533 distribution encoder  $\psi^G$  whose outputs together parameterize the global distribution  $\mathcal{N}(\mu_G, \sigma_G^2)$  over  
 534 the input set, *i.e.*,  $\psi^G(s^G) : \{s_i^G\}_{i=1}^{n+m} \rightarrow (\mu_G, \sigma_G^2)$ . Samples  $\{z_i^G\}_{i=1}^N$  drawn from this distribution  
 535 are proxies for the variables capturing the global correlation over all tasks in the input set. It is indeed  
 536 this sampling step that induces the stochasticity into the learned posteriors of the NPCL.

537 To model finer task-specific distribution for task  $t$  conditioned on the global distribution, we retain the  
 538 task-specific self-attended representations  $s_i^t$  and concatenate these with the global latents  $\{z_i^G\}_{i=1}^N$   
 539 to produce  $N$  distinct encodings per input point. These encodings are then passed through the  $t$ -th  
 540 task distribution encoder  $\psi^t$  that again constitutes a mean and a variance MLP head and produces  
 541 outputs that parameterize the  $t$ -th task distribution  $\mathcal{N}(\mu_t, \sigma_t^2)$ , *i.e.*,  $\psi^t(s^t) : \{s_i^t\}_{i=1}^{n+m} \rightarrow (\mu_t, \sigma_t^2)$ .  
 542 Samples  $\{z_j^t\}_{j=1}^M$  drawn from each such distribution thus capture the per-task stochastic factors. To  
 543 limit the randomness in the learned prior/posterior, we use  $M = 1$ . The latent encoder thus outputs a  
 544 subtotal of  $N * (t + 1)$  encodings per input point.

545 Put together, the global and task-specific latents can be derived as:

$$\begin{aligned} \{z_i^G\}_{i=1}^N &\sim \mathcal{N}(\psi_\mu^G(s^G), \psi_\sigma^G(s^G)) = \mathcal{N}(\mu_G, \sigma_G^2), \\ \{z_i^t\}_{i=1}^M &\sim \mathcal{N}(\psi_\mu^t(s_i^t, z_i^G), \psi_\sigma^t(s_i^t, z_i^G)) = \mathcal{N}(\mu_t, \sigma_t^2), \forall t \in T, \end{aligned} \quad (16)$$

546 where  $\psi^G$  and  $\psi^t$  are the global and per-task distribution encoders, respectively.

547 **Deterministic Encoder.** The deterministic path is similar to that of an ANP [24] where the context  
 548 projections  $\Phi_i^{\text{det}} = \text{MLP}([x_i; y_i])$  form the keys, queries and values for a self-attention operation,

549  $SA_{\text{det}}(\Phi_i^{\text{det}}, \Phi_i^{\text{det}}, \Phi_i^{\text{det}}) : \Phi_i^{\text{det}} \rightarrow r_i$ . The resulting order-invariant context representations  $\{r_i\}_{i=1}^m$  are  
 550 fed as values to a subsequent target-to-context cross-attention operation  $CA_{\text{det}}$ . The keys  $x_i$  and  
 551 queries  $x_*$  for  $CA_{\text{det}}$  come from the context  $x_i \in X_C$  and target  $x_* \in X_T$  covariates, respectively,  
 552 *i.e.*,  $CA_{\text{det}}(x_i, s_C, x_*) : x_* \rightarrow r_*$  where  $r_*$  is invariant to the order of context.

553 **Decoder.** Different from other NP variants, the NPCL decoder adopts separate decoding mechanisms  
 554 during training and inference. At train time, we use the available task identity to filter the true  $N$  out  
 555 of  $N * (t + 1)$  latent path outputs to be processed by the decoder. After this, the decoder concatenates  
 556 a target input  $x_*^t \in X_T^t$  with its  $N$  true task-specific latents  $\{z_i^t\}_{i=1}^N$  obtained from the latent path and  
 557 its order-invariant feature  $r_*$  obtained from the deterministic path thus resulting in  $N$  distinct inputs.  
 558 For  $N > 1$  samples of  $z_t$ , we first make  $N$  copies of  $x_*$  and  $r_*$  each, and then concatenate these with  
 559 each  $z^t$ .  $p_\theta$  thus performs the projection  $p_\theta([x_*; r_*; \{z_i^t\}_{i=1}^N]) : x \rightarrow h_*$  where  $x \in \mathbb{R}^{f+2*o}$  and  $h_*$   
 560 are the logits of an MLP classifier for the target label  $y_*$ . We detail the inference-time decoding in  
 561 section 4.5.

## 562 C Experiments and Reproducibility

563 **Configuration.** For a fair comparison with the benchmarks of Buzzega et al. [4], we fix the batch  
 564 sizes for new task’s samples and for replay samples to 32 each for the class-IL datasets and to 128 each  
 565 for the domain-IL datasets. Both the context and target datasets use the same set of augmentations.  
 566 For S-CIFAR-10, S-CIFAR-100 and S-Tiny-ImageNet, we apply random crops and horizontal flips to  
 567 both stream and buffer examples following Buzzega et al. [4] and Boschini et al. [3]. For each setting  
 568 of memory size on each dataset, NPCL adopts the same learning rate (LR) as reported in Buzzega  
 569 et al. [4] and Boschini et al. [3]. However, NPCL training additionally relies on linearly increasing  
 570 the learning rate (LR) over a period of 4000 iterations for class-IL and 40 iterations for domain-IL  
 571 settings. We further apply gradient clipping [35] on L2-norm of NPCL parameters with a cap of  
 572 10000.

573 **Hyperparameter tuning.** We arrive at the best hyperparameter settings for each of our datasets  
 574 through grid search over a validation set made of 10% of the training set on each dataset. The search  
 575 range for number of samples  $N$  from the global distribution  $\mathcal{N}(\mu_G, \sigma_G^2)$  is [2, 5, 10, 20, 50, 100]. Out  
 576 of these, we found  $N = 50$  during training and  $N = 10$  during evaluation to perform better in general  
 577 across all settings.

578 Similarly, we conducted a grid search over the batch size of the context set  $\mathcal{C}$  over the range  
 579  $[1/16, 1/8, 1/4, 1/2, 1, 1.25]$  of the original (target) batch sizes for each of the dataset. In general,  
 580 we found that fixing the context batch size to  $1/8$  of the target batch size performed better across all  
 581 datasets. Such context batches are sampled from a context dataset  $\mathcal{D}_C^t$  for each task  $t$ .  $\mathcal{D}_C^t$  is itself  
 582 created by randomly selecting a subset of the training samples for each class at the beginning of each  
 583 incremental training task. To decide on the size of the subset for each class, we ran a gridsearch over  
 584 the range [50, 100, 150, 200] samples per class and found that incorporating 100 random samples per  
 585 class into  $\mathcal{D}_C^t$  performed well across all datasets.

586 Finally, to decide on the loss weights  $\alpha, \beta, \gamma$  and  $\delta$  for  $D^t, D^G, \mathcal{L}_{\text{GR}}$ , and  $\mathcal{L}_{\text{TR}}^t$ , we ran gridsearch for  
 587 each over possible values [0.0, 0.01, 0.05, 0.08, 0.1, 0.15, 0.2, 0.4]. We report the best settings across  
 588 datasets in Table 7:

|          | S-CIFAR-10 | S-CIFAR-100 | S-Tiny-ImageNet | P-MNIST | R-MNIST |
|----------|------------|-------------|-----------------|---------|---------|
| $\alpha$ | 0.05       | 0.05        | 0.01            | 0.1     | 0.1     |
| $\beta$  | 0.01       | 0.01        | 0.01            | 0.05    | 0.05    |
| $\gamma$ | 0.2        | 0.08        | 0.05            | 0.1     | 0.1     |
| $\delta$ | 0.1        | 0.1         | 0.1             | 0.15    | 0.15    |

Table 7: Hyperparameters for loss contributions that were tuned on validation sets for each dataset.

589 To further ensure reproducibility, we seed the Pytorch-based data loaders using the instructions men-  
 590 tioned at <https://pytorch.org/docs/stable/notes/randomness.html>. All our experiments  
 591 are then ran using seed values in the range [0, 9].



| Method               | <b>S-CIFAR-10</b><br><i>Class-IL</i> |               | <b>P-MNIST</b><br><i>Domain-IL</i> |              | <b>R-MNIST</b><br><i>Domain-IL</i> |              |
|----------------------|--------------------------------------|---------------|------------------------------------|--------------|------------------------------------|--------------|
| oEWC                 | -91.64                               |               | -36.69                             |              | -24.59                             |              |
| SI                   | -95.78                               |               | -27.91                             |              | -22.91                             |              |
| LwF                  | -96.69                               |               | -                                  |              | -                                  |              |
| $\mathcal{M}_{size}$ | 200                                  | 500           | 200                                | 500          | 200                                | 500          |
| ER                   | -61.24                               | -45.35        | -22.54                             | -14.90       | -8.24                              | -7.52        |
| GEM                  | -82.61                               | -74.31        | -29.38                             | -18.76       | -11.51                             | -7.19        |
| A-GEM                | -95.73                               | -94.01        | -31.69                             | -28.53       | -19.32                             | -19.36       |
| iCaRL                | <b>-28.72</b>                        | <b>-25.71</b> | -                                  | -            | -                                  | -            |
| FDR                  | -86.40                               | -85.62        | -20.62                             | -12.80       | -13.31                             | -6.70        |
| GSS                  | -75.25                               | -62.88        | -47.85                             | -23.68       | -20.19                             | -17.45       |
| HAL                  | -69.11                               | -62.21        | -15.24                             | -11.58       | -11.71                             | -6.78        |
| DER                  | -40.76                               | <b>-26.74</b> | <b>-13.79</b>                      | <b>-8.04</b> | <b>-5.99</b>                       | <b>-3.41</b> |
| ANP                  | -62.80                               | -49.18        | -28.79                             | -16.44       | -12.08                             | -10.63       |
| ST-NPCL              | -46.91                               | -32.50        | -17.03                             | -12.40       | -7.9                               | -8.11        |
| <b>NPCL (ours)</b>   | <b>-39.11</b>                        | -27.62        | <b>-12.81</b>                      | <b>-8.60</b> | <b>-5.70</b>                       | <b>-4.10</b> |

Table 8: Backward transfer scores for the experiments in Table 1. Best results are in red. Second best results are in blue. All runs of ANP, ST-NPCL and NPCL in the CL settings rely on experience replay (ER).

## 592 D Results: Backward Transfer

593 Table 8 reports the backward transfer for the accuracy scores mentioned in table 1. We further  
 594 compute the backward transfer based on uncertainty scores to study the effect of forgetting on  
 595 uncertainty. Fig. 7 shows the correlation between backward transfer of accuracy and uncertainty for  
 596 the domain-IL datasets P-MNIST and R-MNIST.

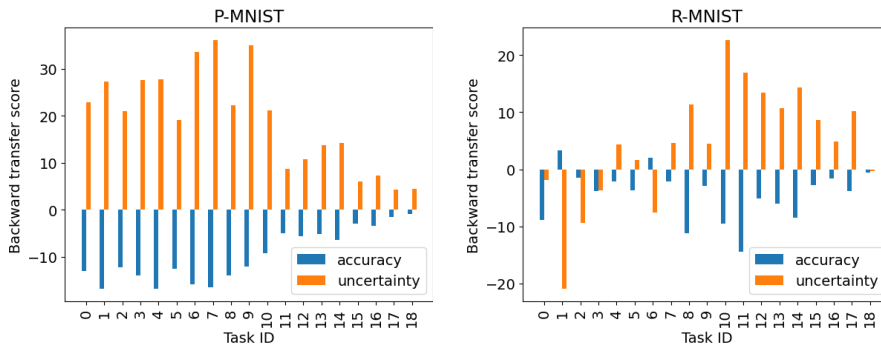

Figure 7: **Backward transfer scores of tasks based on accuracy and uncertainty on domain-IL datasets with  $|\mathcal{M}| = 500$ :** a higher negative backward transfer on accuracy correlates with a higher positive backward transfer on uncertainty and vice-versa. For better visibility, the uncertainty-based backward transfer scores have been scaled by a factor of 100.

## 597 E Ablations

### 598 E.1 Effect of regularization on the learned distributions

599 We record the per epoch L1-norms of global and task-specific means and variances on the last  
 600 incremental task (task 4) of S-CIFAR-10. As shown in Fig. 8(a) and Fig. 8(b), regularizing the  
 601 global distribution (GR) alleviates forgetting by limiting the learning of the global and the current  
 602 task’s (task 4) means and variances. This is evident through larger L1-norm of means and smaller  
 603 L1-norm of variances when GR = 0, *i.e.*, +TR setting. On the other hand, excluding all the objectives,  
 604 *i.e.*, Baseline NPCL as well as excluding TR from the learning objectives, *i.e.*, +GR setting lead to

605 relatively unstable evolution of the past task means and variances, hence characterizing an increased  
 606 forgetting. Including both GR and TR in the objective, *i.e.*, NPCL helps find a balance between  
 607 preserving the global and the past-task distributions while facilitating the learning of the current task  
 distribution.

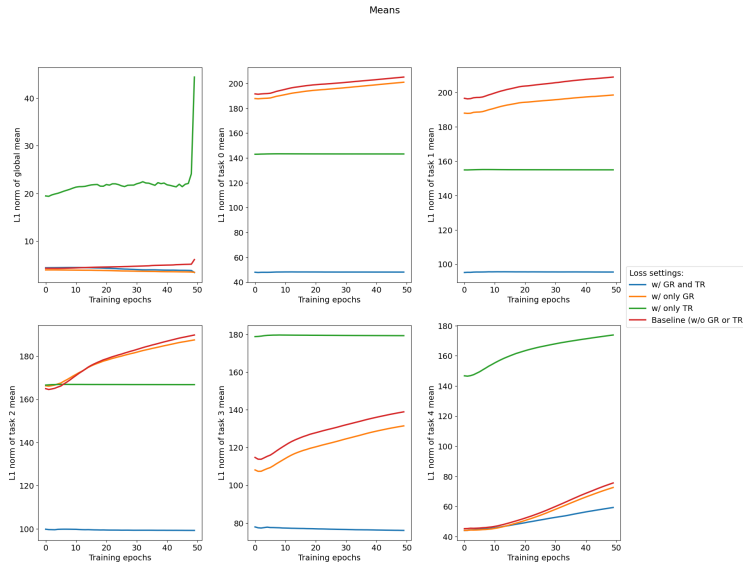

(a) Effect on the global and task-specific means.

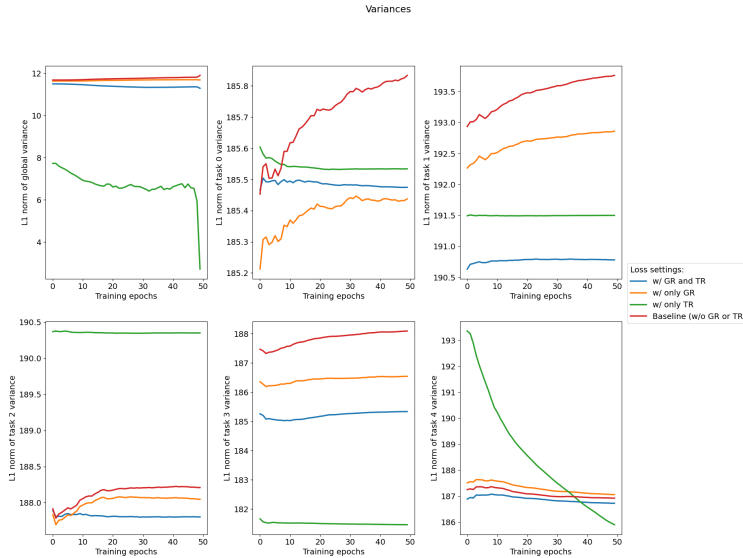

(b) Effect on the global and task-specific variances.

Figure 8: Effect of the proposed global (GR) and task-specific (TR) regularizations on the learning of global and task-specific means and variances during the last incremental training task (task 4) of S-CIFAR-10. NPCL uses both GR and TR while the baseline NPCL uses neither of them.

608

609 **E.2 How does forgetting effect uncertainty?**

610 Fig. 9 ablates the average accuracies and uncertainties of each task head predictions over the test  
 611 set of each task at the end of incremental training on S-CIFAR-100. Similar to S-CIFAR-10 (Fig.  
 612 4), we observe that the accuracy of predictions made by true task heads are higher than the rest.  
 613 For predictive uncertainties, the trend is the opposite. Also, more recently trained tasks show lesser  
 614 forgetting both in terms of accuracy (higher values) and uncertainty (lower values). This generalizes

615 our conclusion on S-CIFAR-10 regarding the outreach of forgetting in CL going beyond accuracy and to other aspects of learning such as the model’s predictive confidence.

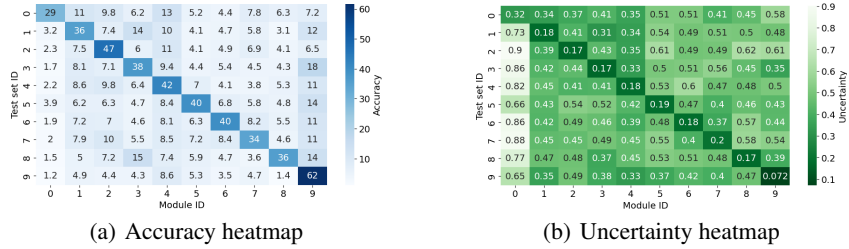

Figure 9: Heatmaps depicting the average accuracy and uncertainty of individual task test sets per task head on S-CIFAR-100 with  $|\mathcal{M}| = 500$  over an individual run.

616

### 617 E.3 Storage gain of NPCL over DER

618 Table 9 compares the total episodic memory sizes of NPCL (ours) and DER [4]. We report storage  
 619 sizes as the dimension of a single 1-d vector constructed by flattening all the vectors that need to  
 620 be stored by each method in the episodic memory. Namely, NPCL stores  $2 * t + 2$  vectors of fixed  
 621 dimension  $\mathbb{R}^{|\mathcal{o}|}$  where  $t$  is the total number of tasks in a dataset and  $\mathcal{o}$  is the output size of the mean  
 622 and variance heads. On the other hand, DER stores  $|\mathcal{M}|$  number of logits of dimension  $\mathbb{R}^{N_C}$  where  
 623  $N_C$  denotes the total number of classes in a CL dataset. As a result, NPCL has significant storage  
 624 gains on settings with either large number of classes or a larger memory size. It is worth noting that  
 625 both NPCL and DER rely on storing original input images and therefore, our comparison does not  
 take the inputs into account.

| Method               | S-CIFAR-10 |              | S-CIFAR-100   |               | S-Tiny-ImageNet |               | P-MNIST     |              | R-MNIST     |              |
|----------------------|------------|--------------|---------------|---------------|-----------------|---------------|-------------|--------------|-------------|--------------|
| $\mathcal{M}_{size}$ | 200        | 500          | 500           | 2000          | 200             | 500           | 200         | 500          | 200         | 500          |
| DER [4]              | 2000       | 5000         | 50000         | 200000        | 40000           | 100000        | 2000        | 5000         | 2000        | 5000         |
| <b>NPCL (ours)</b>   | 3272       | 3572         | 6132          | 7632          | 5832            | 6132          | 1544        | 1844         | 1544        | 1844         |
| Storage gain (%)     | -63.6      | <b>28.56</b> | <b>87.746</b> | <b>96.184</b> | <b>85.42</b>    | <b>93.868</b> | <b>22.8</b> | <b>63.12</b> | <b>22.8</b> | <b>63.12</b> |

Table 9: Storage size comparison of NPCL with DER across different experimental settings of Table 1. Gains are marked in **bold**.

626

### 627 E.4 Out-of-the box novel data identification

628 Our novel data identification experiments use the S-CIFAR-10 and S-CIFAR-100 datasets interchange-  
 629 ably as  $\mathcal{D}_{ID}$  and  $\mathcal{D}_{OOD}$  given the high degree of similarity between a number of their classes [20].<sup>1</sup>  
 630 Namely, while evaluating the NPCL trained on S-CIFAR-100, we consider the entire CIFAR-10 test  
 631 set as  $\mathcal{D}_{OOD}$  whereas the evaluation of the S-CIFAR-10 model treats the test set of first 10 class labels  
 632 of CIFAR100 to be  $\mathcal{D}_{OOD}$ . Further, for an incremental task  $t$ , the test sets for  $[0, t]$  tasks make up for  
 633 the ID data  $\mathcal{D}_{ID}$ .

634 As shown in Table 10, the variances computed using either of our proposed metrics on  $\mathcal{D}_{ID}$  are up  
 635 to a magnitude lower than those on  $\mathcal{D}_{OOD}$ . This trend is evident across the incremental evaluation  
 636 steps even if the differences in the variances between  $\mathcal{D}_{ID}$  and  $\mathcal{D}_{OOD}$  slump with the further arriving  
 637 tasks. Moreover, for the model trained on the more challenging S-CIFAR-100 setting, we observe  
 638 that the differences between the  $\mathcal{D}_{ID}$  and  $\mathcal{D}_{OOD}$  variances even grow during the course of incremental  
 639 training. This implies the potential perks of enabling the inter-task knowledge sharing among NPCL  
 640 parameters in a CL setup.

<sup>1</sup>The labels for first ten CIFAR-100 classes are the same as <https://huggingface.co/datasets/cifar100> and that for CIFAR-10 classes are the same as <https://huggingface.co/datasets/cifar10>.

| Incremental step | CIFAR-100 on S-CIFAR-10 model |                             |                       |                        | CIFAR-10 on S-CIFAR-100 model |                             |                       |                        |
|------------------|-------------------------------|-----------------------------|-----------------------|------------------------|-------------------------------|-----------------------------|-----------------------|------------------------|
|                  | $\mathcal{D}_{ID}(\delta)$    | $\mathcal{D}_{OOD}(\delta)$ | $\mathcal{D}_{ID}(H)$ | $\mathcal{D}_{OOD}(H)$ | $\mathcal{D}_{ID}(\delta)$    | $\mathcal{D}_{OOD}(\delta)$ | $\mathcal{D}_{ID}(H)$ | $\mathcal{D}_{OOD}(H)$ |
| 1                | $1e^{-6}$                     | $1e^{-5}$                   | $9.3e^{-6}$           | $8.4e^{-5}$            | $1.5e^{-6}$                   | $8.9e^{-6}$                 | $1.5e^{-4}$           | $1e^{-3}$              |
| 2                | $2.6e^{-6}$                   | $1.4e^{-5}$                 | $6.3e^{-5}$           | $2.2e^{-4}$            | $1.9e^{-6}$                   | $5.8e^{-6}$                 | $5.3e^{-4}$           | $1.7e^{-3}$            |
| 3                | $2.3e^{-6}$                   | $6.2e^{-6}$                 | $6.7e^{-5}$           | $2.1e^{-4}$            | $1.2e^{-6}$                   | $3.6e^{-6}$                 | $4.4e^{-4}$           | $1.5e^{-3}$            |
| 4                | $8.1e^{-7}$                   | $4.8e^{-6}$                 | $4.6e^{-5}$           | $2.2e^{-4}$            | $1.1e^{-6}$                   | $2.5e^{-6}$                 | $3.5e^{-4}$           | $1.2e^{-3}$            |
| 5                | $7.1e^{-7}$                   | $1.7e^{-6}$                 | $4.6e^{-5}$           | $1.1e^{-4}$            | $8e^{-7}$                     | $2e^{-6}$                   | $4.4e^{-4}$           | $1.2e^{-3}$            |
| 6                | -                             | -                           | -                     | -                      | $6.8e^{-7}$                   | $1.3e^{-6}$                 | $4.1e^{-4}$           | $8.5e^{-4}$            |
| 7                | -                             | -                           | -                     | -                      | $4.e^{-7}$                    | $1.3e^{-6}$                 | $3.2e^{-4}$           | $8.3e^{-4}$            |
| 8                | -                             | -                           | -                     | -                      | $4.9e^{-7}$                   | $1e^{-6}$                   | $3.2e^{-4}$           | $6.7e^{-4}$            |
| 9                | -                             | -                           | -                     | -                      | $3e^{-7}$                     | $6.9e^{-7}$                 | $2.5e^{-4}$           | $4.7e^{-4}$            |
| 10               | -                             | -                           | -                     | -                      | $3.3e^{-7}$                   | $5.1e^{-7}$                 | $2.5e^{-4}$           | $3.5e^{-4}$            |

Table 10: Average variances over softmax ( $\delta$ ) and entropy ( $H$ ) scores of incremental models on in-distribution (ID) and out-of-distribution (OOD) test sets using  $N = 50$  samples

### 641 E.5 Instance-Level Model Confidence Evaluation

642 For each target instance  $x_*$ , the instance-level model confidence evaluation framework [16] uses the  
643  $N$  predictions obtained from stochastic sampling to compute: (a) the prediction interval width (PIW)  
644 between the  $[2.5, 97.5]$  percentile range of the  $N$  predicted classes, (b) the paired two-sample  $t$ -test  
645 [9] to evaluate the significance of difference between the mean predicted probabilities for the top-2  
646 most predicted classes. As a prerequisite to the latter test, we first verify the normality assumption of  
647 the probability differences for NPCL (Fig. 10).

648 Similar to Fan et al. [9], after computing the PIW per test instance, we split the instances into two  
649 groups by the correctness of the majority-vote predictions, obtain the PIW of the true class per  
650 instance, and compute the mean PIW of the true class within each group. For  $t$ -test evaluation, we  
compute the mean accuracy per group of the test instances split by their  $t$ -test rejection status.

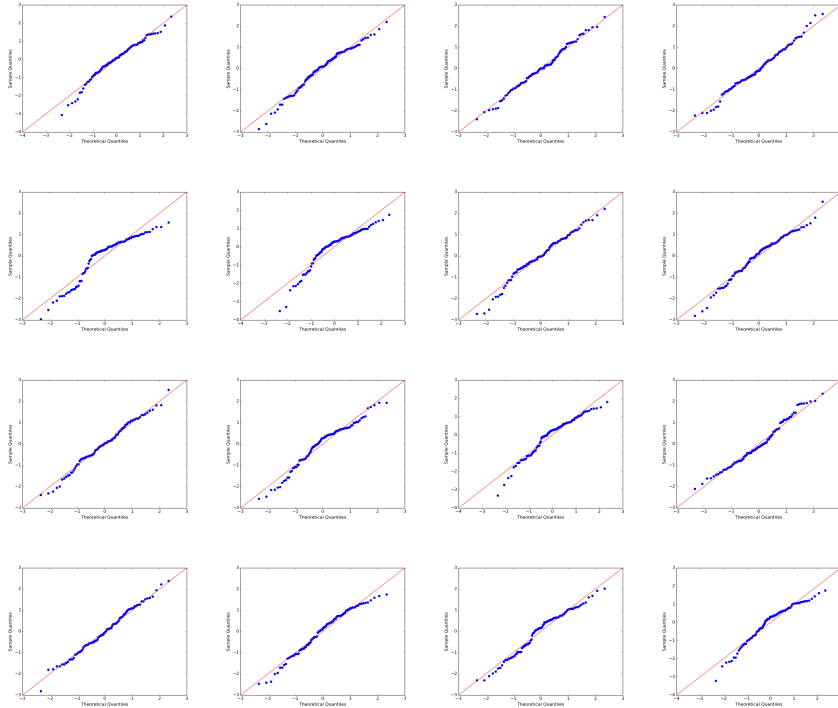

Figure 10: Q-Q plots for the differences in probability between the most and the second most predicted class.

| Class | Accuracy | PIW     |           | Accuracy by $t$ -test status |              |
|-------|----------|---------|-----------|------------------------------|--------------|
|       |          | Correct | Incorrect | Rejected                     | Not Rejected |
| 1     | 82.30    | 74.17   | 102.21    | 83.37                        | 50.00        |
| 2     | 94.00    | 62.90   | 79.86     | 94.07                        | 80.00        |
| 3     | 74.00    | 54.92   | 68.48     | 74.14                        | 64.29        |
| 4     | 71.50    | 65.42   | 74.32     | 72.06                        | 25.00        |
| 5     | 84.80    | 92.93   | 106.90    | 85.37                        | 22.22        |
| 6     | 76.50    | 75.22   | 103.58    | 76.58                        | 60.00        |
| 7     | 94.20    | 104.9   | 129.56    | 94.39                        | 3.00         |
| 8     | 90.50    | 81.10   | 127.06    | 91.12                        | 22.22        |
| 9     | 96.90    | 72.81   | 110.86    | 97.00                        | 66.67        |
| 10    | 96.30    | 80.60   | 109.56    | 96.48                        | 60.00        |

Table 11: PIW (multiplied by 100) and  $t$ -test results for classes inferred from their respective task heads after S-CIFAR-10 training.
